# Supplementary material for: Response of dung beetle diversity to remediation of soil ecosystems in the Ecuadorian Amazon
Source: PeerJ. 2023 Mar 14;11:e14975. doi: 10.7717/peerj.14975 (PMC10022510; doi:10.7717/peerj.14975)
Supplement: Supplemental Information 1 — The general data for all the dung beetles collected: the species collected, the type of ecosystem, the repetition, the specific abundance, and the month of collection. We used this sheet to obtain table 3 and to extract the monthly abundance, richness, and diversity index. In the diversity index sheet, we present the monthly variation of the abundance, richness, and diversity of Shannon: the ecosystems, the repetition, the moths, the richness, the abundance, and the Shannon index. With this data, we performed the analysis of variance and the comparison of means tests, and we elaborated table 4, and figures 2, 3, 4, and 5. [file peerj-11-14975-s001.xlsx]

## Sheet: GENERAL DATA
SPECIES	ECOSYSTEMS	REPETITION	ABUNDANCE	MONTH
Canthidium aurifex Bates, 1887	Natural forest	1	1	February
Canthidium aurifex Bates, 1887	Natural forest	4	1	March
Canthidium aurifex Bates, 1887	Sensitive ecosystems	1	1	February
Canthidium aurifex Bates, 1887	Sensitive ecosystems	3	1	March
Canthidium aurifex Bates, 1887	Sensitive ecosystems	4	1	March
Canthidium aurifex Bates, 1887	Natural forest	4	1	September
Canthidium aurifex Bates, 1887	Natural forest	3	1	October
Canthidium aurifex Bates, 1887	Natural forest	3	1	November
Canthidium aurifex Bates, 1887	Natural forest	4	1	November
Canthidium aurifex Bates, 1887	Natural forest	1	1	December
Canthidium aurifex Bates, 1887	Natural forest	1	1	December
Canthidium aurifex Bates, 1887	Natural forest	4	1	December
Canthidium cf rufinum Harold, 1867	Natural forest	1	5	February
Canthidium cf rufinum Harold, 1867	Natural forest	1	1	March
Canthidium cf rufinum Harold, 1867	Natural forest	2	1	February
Canthidium cf rufinum Harold, 1867	Natural forest	3	1	March
Canthidium cf rufinum Harold, 1867	Natural forest	3	1	February
Canthidium cf rufinum Harold, 1867	Natural forest	4	2	February
Canthidium cf rufinum Harold, 1867	Natural forest	4	6	March
Canthidium cf rufinum Harold, 1867	Natural forest	2	3	August
Canthidium cf rufinum Harold, 1867	Natural forest	3	1	August
Canthidium cf rufinum Harold, 1867	Natural forest	2	1	September
Canthidium cf rufinum Harold, 1867	Natural forest	1	7	October
Canthidium cf rufinum Harold, 1867	Natural forest	1	7	October
Canthidium cf rufinum Harold, 1867	Natural forest	2	5	October
Canthidium cf rufinum Harold, 1867	Natural forest	2	1	October
Canthidium cf rufinum Harold, 1867	Natural forest	3	1	October
Canthidium cf rufinum Harold, 1867	Natural forest	3	9	October
Canthidium cf rufinum Harold, 1867	Natural forest	4	8	October
Canthidium cf rufinum Harold, 1867	Natural forest	2	1	November
Canthidium cf rufinum Harold, 1867	Natural forest	4	1	November
Canthidium cf rufinum Harold, 1867	Natural forest	1	1	December
Canthidium cf rufinum Harold, 1867	Natural forest	2	1	December
Canthidium cf rufinum Harold, 1867	Natural forest	4	1	December
Canthidium cf rufinum Harold, 1867	Natural forest	1	1	January 2019
Canthidium cf rufinum Harold, 1867	Natural forest	1	7	January 2019
Canthidium cf rufinum Harold, 1867	Natural forest	2	1	January 2019
Canthidium cf rufinum Harold, 1867	Natural forest	3	1	January 2019
Canthidium cf rufinum Harold, 1867	Natural forest	4	1	January 2019
Canthidium onitoides Perty, 1830	Natural forest	4	1	February
Canthidium onitoides Perty, 1830	Natural forest	1	1	October
Canthidium onitoides Perty, 1830	Natural forest	4	1	November
Canthidium sp1	Natural forest	2	2	March
Canthidium sp1	Natural forest	4	3	February
Canthidium sp1	Sensitive ecosystems	4	3	March
Canthidium sp1	Natural forest	1	1	August
Canthidium sp1	Natural forest	4	1	August
Canthidium sp1	Natural forest	4	2	November
Canthidium sp1	Natural forest	4	1	December
Canthidium sp1	Palm plantations	1	1	October
Canthon aequinoctialis Harold, 1868	Natural forest	1	184	February
Canthon aequinoctialis Harold, 1868	Natural forest	1	50	March
Canthon aequinoctialis Harold, 1868	Natural forest	1	13	July
Canthon aequinoctialis Harold, 1868	Natural forest	2	188	February
Canthon aequinoctialis Harold, 1868	Natural forest	2	8	March
Canthon aequinoctialis Harold, 1868	Natural forest	2	67	July
Canthon aequinoctialis Harold, 1868	Natural forest	3	91	February
Canthon aequinoctialis Harold, 1868	Natural forest	3	18	March
Canthon aequinoctialis Harold, 1868	Natural forest	3	6	July
Canthon aequinoctialis Harold, 1868	Natural forest	4	200	February
Canthon aequinoctialis Harold, 1868	Natural forest	4	18	March
Canthon aequinoctialis Harold, 1868	Natural forest	4	17	July
Canthon aequinoctialis Harold, 1868	Sensitive ecosystems	4	12	February
Canthon aequinoctialis Harold, 1868	Natural forest	1	14	August
Canthon aequinoctialis Harold, 1868	Natural forest	2	5	August
Canthon aequinoctialis Harold, 1868	Natural forest	2	1	August
Canthon aequinoctialis Harold, 1868	Natural forest	3	1	August
Canthon aequinoctialis Harold, 1868	Natural forest	3	17	August
Canthon aequinoctialis Harold, 1868	Natural forest	4	16	August
Canthon aequinoctialis Harold, 1868	Natural forest	1	2	September
Canthon aequinoctialis Harold, 1868	Natural forest	4	11	September
Canthon aequinoctialis Harold, 1868	Natural forest	1	5	October
Canthon aequinoctialis Harold, 1868	Natural forest	2	3	October
Canthon aequinoctialis Harold, 1868	Natural forest	1	36	November
Canthon aequinoctialis Harold, 1868	Natural forest	2	11	November
Canthon aequinoctialis Harold, 1868	Natural forest	2	104	November
Canthon aequinoctialis Harold, 1868	Natural forest	2	1	November
Canthon aequinoctialis Harold, 1868	Natural forest	3	5	November
Canthon aequinoctialis Harold, 1868	Natural forest	3	45	November
Canthon aequinoctialis Harold, 1868	Natural forest	4	40	November
Canthon aequinoctialis Harold, 1868	Natural forest	1	2	December
Canthon aequinoctialis Harold, 1868	Natural forest	1	60	December
Canthon aequinoctialis Harold, 1868	Natural forest	2	3	December
Canthon aequinoctialis Harold, 1868	Natural forest	2	71	December
Canthon aequinoctialis Harold, 1868	Natural forest	3	73	December
Canthon aequinoctialis Harold, 1868	Natural forest	4	2	December
Canthon aequinoctialis Harold, 1868	Natural forest	4	66	December
Canthon aequinoctialis Harold, 1868	Natural forest	1	8	January 2019
Canthon aequinoctialis Harold, 1868	Natural forest	2	1	January 2019
Canthon aequinoctialis Harold, 1868	Natural forest	3	5	January 2019
Canthon aequinoctialis Harold, 1868	Natural forest	4	22	January 2019
Canthon angustatus	Natural forest	3	1	December
Canthon luteicoliis Erichson, 1847	Natural forest	1	4	February
Canthon luteicoliis Erichson, 1847	Natural forest	1	5	March
Canthon luteicoliis Erichson, 1847	Natural forest	1	1	July
Canthon luteicoliis Erichson, 1847	Natural forest	2	8	February
Canthon luteicoliis Erichson, 1847	Natural forest	2	3	March
Canthon luteicoliis Erichson, 1847	Natural forest	3	3	February
Canthon luteicoliis Erichson, 1847	Natural forest	3	2	March
Canthon luteicoliis Erichson, 1847	Natural forest	4	7	February
Canthon luteicoliis Erichson, 1847	Natural forest	4	2	March
Canthon luteicoliis Erichson, 1847	Sensitive ecosystems	4	1	February
Canthon luteicoliis Erichson, 1847	Natural forest	1	11	August
Canthon luteicoliis Erichson, 1847	Natural forest	2	1	August
Canthon luteicoliis Erichson, 1847	Natural forest	1	1	September
Canthon luteicoliis Erichson, 1847	Natural forest	2	1	September
Canthon luteicoliis Erichson, 1847	Natural forest	3	1	September
Canthon luteicoliis Erichson, 1847	Natural forest	4	1	September
Canthon luteicoliis Erichson, 1847	Natural forest	4	2	September
Canthon luteicoliis Erichson, 1847	Natural forest	1	6	October
Canthon luteicoliis Erichson, 1847	Natural forest	1	3	October
Canthon luteicoliis Erichson, 1847	Natural forest	2	1	October
Canthon luteicoliis Erichson, 1847	Natural forest	2	4	October
Canthon luteicoliis Erichson, 1847	Natural forest	3	8	October
Canthon luteicoliis Erichson, 1847	Natural forest	4	4	October
Canthon luteicoliis Erichson, 1847	Natural forest	2	1	November
Canthon luteicoliis Erichson, 1847	Natural forest	4	1	November
Canthon luteicoliis Erichson, 1847	Palm plantations	2	1	November
Canthon luteicoliis Erichson, 1847	Natural forest	1	5	December
Canthon luteicoliis Erichson, 1847	Natural forest	2	1	December
Canthon luteicoliis Erichson, 1847	Natural forest	4	1	December
Canthon luteicoliis Erichson, 1847	Natural forest	1	2	January 2019
Canthon luteicoliis Erichson, 1847	Natural forest	4	2	January 2019
Coprophaneus telamon Erichson, 1847	Agricultural soils	3	1	March
Coprophaneus telamon Erichson, 1847	Agricultural soils	3	2	July
Coprophaneus telamon Erichson, 1847	Natural forest	1	14	February
Coprophaneus telamon Erichson, 1847	Natural forest	1	9	May
Coprophaneus telamon Erichson, 1847	Natural forest	1	5	June
Coprophaneus telamon Erichson, 1847	Natural forest	1	5	July
Coprophaneus telamon Erichson, 1847	Natural forest	1	1	July
Coprophaneus telamon Erichson, 1847	Natural forest	2	12	February
Coprophaneus telamon Erichson, 1847	Natural forest	2	15	March
Coprophaneus telamon Erichson, 1847	Natural forest	2	5	May
Coprophaneus telamon Erichson, 1847	Natural forest	2	11	June
Coprophaneus telamon Erichson, 1847	Natural forest	2	2	July
Coprophaneus telamon Erichson, 1847	Natural forest	2	1	February
Coprophaneus telamon Erichson, 1847	Natural forest	3	4	February
Coprophaneus telamon Erichson, 1847	Natural forest	3	18	March
Coprophaneus telamon Erichson, 1847	Natural forest	3	3	May
Coprophaneus telamon Erichson, 1847	Natural forest	3	3	June
Coprophaneus telamon Erichson, 1847	Natural forest	3	5	July
Coprophaneus telamon Erichson, 1847	Natural forest	3	2	June
Coprophaneus telamon Erichson, 1847	Natural forest	4	4	February
Coprophaneus telamon Erichson, 1847	Natural forest	4	9	March
Coprophaneus telamon Erichson, 1847	Natural forest	4	2	May
Coprophaneus telamon Erichson, 1847	Natural forest	4	5	June
Coprophaneus telamon Erichson, 1847	Natural forest	4	4	July
Coprophaneus telamon Erichson, 1847	Sensitive ecosystems	1	6	February
Coprophaneus telamon Erichson, 1847	Sensitive ecosystems	3	1	March
Coprophaneus telamon Erichson, 1847	Sensitive ecosystems	3	1	July
Coprophaneus telamon Erichson, 1847	Sensitive ecosystems	4	8	March
Coprophaneus telamon Erichson, 1847	Palm plantations	1	1	May
Coprophaneus telamon Erichson, 1847	Palm plantations	1	1	July
Coprophaneus telamon Erichson, 1847	Palm plantations	2	1	July
Coprophaneus telamon Erichson, 1847	Palm plantations	3	3	February
Coprophaneus telamon Erichson, 1847	Palm plantations	3	2	March
Coprophaneus telamon Erichson, 1847	Palm plantations	4	1	March
Coprophaneus telamon Erichson, 1847	Natural forest	1	5	August
Coprophaneus telamon Erichson, 1847	Natural forest	2	4	August
Coprophaneus telamon Erichson, 1847	Natural forest	3	9	August
Coprophaneus telamon Erichson, 1847	Natural forest	3	1	August
Coprophaneus telamon Erichson, 1847	Natural forest	4	1	August
Coprophaneus telamon Erichson, 1847	Palm plantations	2	1	August
Coprophaneus telamon Erichson, 1847	Agricultural soils	2	1	September
Coprophaneus telamon Erichson, 1847	Agricultural soils	3	2	September
Coprophaneus telamon Erichson, 1847	Natural forest	1	8	September
Coprophaneus telamon Erichson, 1847	Natural forest	1	1	September
Coprophaneus telamon Erichson, 1847	Natural forest	2	2	September
Coprophaneus telamon Erichson, 1847	Natural forest	3	1	September
Coprophaneus telamon Erichson, 1847	Natural forest	3	1	September
Coprophaneus telamon Erichson, 1847	Natural forest	4	1	September
Coprophaneus telamon Erichson, 1847	Natural forest	4	1	September
Coprophaneus telamon Erichson, 1847	Palm plantations	1	1	September
Coprophaneus telamon Erichson, 1847	Palm plantations	2	1	September
Coprophaneus telamon Erichson, 1847	Palm plantations	3	1	September
Coprophaneus telamon Erichson, 1847	Palm plantations	4	3	September
Coprophaneus telamon Erichson, 1847	Agricultural soils	3	2	October
Coprophaneus telamon Erichson, 1847	Natural forest	1	3	October
Coprophaneus telamon Erichson, 1847	Natural forest	1	1	October
Coprophaneus telamon Erichson, 1847	Natural forest	2	9	October
Coprophaneus telamon Erichson, 1847	Natural forest	2	1	October
Coprophaneus telamon Erichson, 1847	Natural forest	3	2	October
Coprophaneus telamon Erichson, 1847	Natural forest	3	1	October
Coprophaneus telamon Erichson, 1847	Natural forest	4	1	October
Coprophaneus telamon Erichson, 1847	Natural forest	4	1	October
Coprophaneus telamon Erichson, 1847	Palm plantations	3	3	October
Coprophaneus telamon Erichson, 1847	Palm plantations	4	1	October
Coprophaneus telamon Erichson, 1847	Agricultural soils	4	1	November
Coprophaneus telamon Erichson, 1847	Natural forest	1	2	November
Coprophaneus telamon Erichson, 1847	Natural forest	2	4	November
Coprophaneus telamon Erichson, 1847	Natural forest	3	17	November
Coprophaneus telamon Erichson, 1847	Natural forest	3	2	November
Coprophaneus telamon Erichson, 1847	Sensitive ecosystems	4	1	November
Coprophaneus telamon Erichson, 1847	Palm plantations	4	1	November
Coprophaneus telamon Erichson, 1847	Natural forest	1	9	December
Coprophaneus telamon Erichson, 1847	Natural forest	2	6	December
Coprophaneus telamon Erichson, 1847	Natural forest	3	23	December
Coprophaneus telamon Erichson, 1847	Natural forest	3	1	December
Coprophaneus telamon Erichson, 1847	Natural forest	3	1	December
Coprophaneus telamon Erichson, 1847	Natural forest	4	8	December
Coprophaneus telamon Erichson, 1847	Sensitive ecosystems	3	4	December
Coprophaneus telamon Erichson, 1847	Palm plantations	2	1	December
Coprophaneus telamon Erichson, 1847	Palm plantations	3	1	December
Coprophaneus telamon Erichson, 1847	Palm plantations	4	1	December
Coprophaneus telamon Erichson, 1847	Agricultural soils	2	1	January 2019
Coprophaneus telamon Erichson, 1847	Agricultural soils	4	1	January 2019
Coprophaneus telamon Erichson, 1847	Natural forest	1	6	January 2019
Coprophaneus telamon Erichson, 1847	Natural forest	1	2	January 2019
Coprophaneus telamon Erichson, 1847	Natural forest	2	9	January 2019
Coprophaneus telamon Erichson, 1847	Natural forest	3	6	January 2019
Coprophaneus telamon Erichson, 1847	Natural forest	3	1	January 2019
Coprophaneus telamon Erichson, 1847	Natural forest	4	4	January 2019
Coprophaneus telamon Erichson, 1847	Sensitive ecosystems	4	1	January 2019
Coprophaneus telamon Erichson, 1847	Palm plantations	1	2	January 2019
Coprophaneus telamon Erichson, 1847	Palm plantations	3	4	January 2019
Coprophaneus telamon Erichson, 1847	Palm plantations	4	3	January 2019
Coprophaneus telamon Erichson, 1847+B17	Natural forest	1	13	March
Deltochilum amazonicum Kolbe, 1905	Natural forest	1	3	February
Deltochilum amazonicum Kolbe, 1905	Natural forest	1	13	March
Deltochilum amazonicum Kolbe, 1905	Natural forest	1	1	June
Deltochilum amazonicum Kolbe, 1905	Natural forest	1	1	July
Deltochilum amazonicum Kolbe, 1905	Natural forest	1	4	February
Deltochilum amazonicum Kolbe, 1905	Natural forest	1	2	March
Deltochilum amazonicum Kolbe, 1905	Natural forest	2	13	February
Deltochilum amazonicum Kolbe, 1905	Natural forest	2	7	March
Deltochilum amazonicum Kolbe, 1905	Natural forest	2	1	May
Deltochilum amazonicum Kolbe, 1905	Natural forest	2	2	June
Deltochilum amazonicum Kolbe, 1905	Natural forest	2	1	February
Deltochilum amazonicum Kolbe, 1905	Natural forest	2	1	July
Deltochilum amazonicum Kolbe, 1905	Natural forest	3	8	February
Deltochilum amazonicum Kolbe, 1905	Natural forest	3	19	March
Deltochilum amazonicum Kolbe, 1905	Natural forest	3	1	June
Deltochilum amazonicum Kolbe, 1905	Natural forest	3	3	July
Deltochilum amazonicum Kolbe, 1905	Natural forest	4	11	February
Deltochilum amazonicum Kolbe, 1905	Natural forest	4	10	March
Deltochilum amazonicum Kolbe, 1905	Natural forest	4	1	June
Deltochilum amazonicum Kolbe, 1905	Natural forest	4	3	February
Deltochilum amazonicum Kolbe, 1905	Natural forest	1	2	August
Deltochilum amazonicum Kolbe, 1905	Natural forest	2	2	August
Deltochilum amazonicum Kolbe, 1905	Natural forest	3	1	August
Deltochilum amazonicum Kolbe, 1905	Natural forest	4	1	August
Deltochilum amazonicum Kolbe, 1905	Palm plantations	4	1	September
Deltochilum amazonicum Kolbe, 1905	Natural forest	1	1	October
Deltochilum amazonicum Kolbe, 1905	Natural forest	4	1	October
Deltochilum amazonicum Kolbe, 1905	Palm plantations	3	1	October
Deltochilum amazonicum Kolbe, 1905	Natural forest	1	5	November
Deltochilum amazonicum Kolbe, 1905	Natural forest	1	1	November
Deltochilum amazonicum Kolbe, 1905	Natural forest	2	9	November
Deltochilum amazonicum Kolbe, 1905	Natural forest	2	4	November
Deltochilum amazonicum Kolbe, 1905	Natural forest	4	8	November
Deltochilum amazonicum Kolbe, 1905	Natural forest	4	1	November
Deltochilum amazonicum Kolbe, 1905	Natural forest	1	9	December
Deltochilum amazonicum Kolbe, 1905	Natural forest	2	9	December
Deltochilum amazonicum Kolbe, 1905	Natural forest	2	1	December
Deltochilum amazonicum Kolbe, 1905	Natural forest	3	2	December
Deltochilum amazonicum Kolbe, 1905	Natural forest	3	1	December
Deltochilum amazonicum Kolbe, 1905	Natural forest	4	8	December
Deltochilum amazonicum Kolbe, 1905	Natural forest	4	2	December
Deltochilum amazonicum Kolbe, 1905	Palm plantations	3	1	December
Deltochilum amazonicum Kolbe, 1905	Natural forest	4	2	January 2019
Deltochilum carinatum Westwood, 1837	Natural forest	1	1	February
Deltochilum carinatum Westwood, 1837	Natural forest	1	1	March
Deltochilum carinatum Westwood, 1837	Natural forest	1	1	May
Deltochilum carinatum Westwood, 1837	Natural forest	2	1	February
Deltochilum carinatum Westwood, 1837	Natural forest	2	1	June
Deltochilum carinatum Westwood, 1837	Natural forest	3	1	May
Deltochilum carinatum Westwood, 1837	Natural forest	1	1	October
Deltochilum howdeni Martínez, 1955	Natural forest	1	7	February
Deltochilum howdeni Martínez, 1955	Natural forest	1	30	March
Deltochilum howdeni Martínez, 1955	Natural forest	1	23	May
Deltochilum howdeni Martínez, 1955	Natural forest	1	19	June
Deltochilum howdeni Martínez, 1955	Natural forest	1	15	July
Deltochilum howdeni Martínez, 1955	Natural forest	1	2	February
Deltochilum howdeni Martínez, 1955	Natural forest	2	18	February
Deltochilum howdeni Martínez, 1955	Natural forest	2	13	March
Deltochilum howdeni Martínez, 1955	Natural forest	2	12	May
Deltochilum howdeni Martínez, 1955	Natural forest	2	12	June
Deltochilum howdeni Martínez, 1955	Natural forest	2	11	July
Deltochilum howdeni Martínez, 1955	Natural forest	2	1	February
Deltochilum howdeni Martínez, 1955	Natural forest	3	26	February
Deltochilum howdeni Martínez, 1955	Natural forest	3	36	March
Deltochilum howdeni Martínez, 1955	Natural forest	3	13	May
Deltochilum howdeni Martínez, 1955	Natural forest	3	18	June
Deltochilum howdeni Martínez, 1955	Natural forest	3	21	July
Deltochilum howdeni Martínez, 1955	Natural forest	3	1	February
Deltochilum howdeni Martínez, 1955	Natural forest	4	8	February
Deltochilum howdeni Martínez, 1955	Natural forest	4	13	March
Deltochilum howdeni Martínez, 1955	Natural forest	4	8	May
Deltochilum howdeni Martínez, 1955	Natural forest	4	25	June
Deltochilum howdeni Martínez, 1955	Natural forest	4	9	July
Deltochilum howdeni Martínez, 1955	Sensitive ecosystems	4	1	February
Deltochilum howdeni Martínez, 1955	Sensitive ecosystems	4	6	March
Deltochilum howdeni Martínez, 1955	Sensitive ecosystems	4	1	July
Deltochilum howdeni Martínez, 1955	Sensitive ecosystems	4	1	February
Deltochilum howdeni Martínez, 1955	Sensitive ecosystems	4	1	March
Deltochilum howdeni Martínez, 1955	Natural forest	1	18	August
Deltochilum howdeni Martínez, 1955	Natural forest	1	4	August
Deltochilum howdeni Martínez, 1955	Natural forest	2	15	August
Deltochilum howdeni Martínez, 1955	Natural forest	2	3	August
Deltochilum howdeni Martínez, 1955	Natural forest	3	13	August
Deltochilum howdeni Martínez, 1955	Natural forest	3	4	August
Deltochilum howdeni Martínez, 1955	Natural forest	4	14	August
Deltochilum howdeni Martínez, 1955	Natural forest	4	1	August
Deltochilum howdeni Martínez, 1955	Natural forest	1	13	September
Deltochilum howdeni Martínez, 1955	Natural forest	2	7	September
Deltochilum howdeni Martínez, 1955	Natural forest	2	1	September
Deltochilum howdeni Martínez, 1955	Natural forest	3	3	September
Deltochilum howdeni Martínez, 1955	Natural forest	4	7	September
Deltochilum howdeni Martínez, 1955	Natural forest	4	4	September
Deltochilum howdeni Martínez, 1955	Palm plantations	4	1	September
Deltochilum howdeni Martínez, 1955	Natural forest	1	17	October
Deltochilum howdeni Martínez, 1955	Natural forest	1	6	October
Deltochilum howdeni Martínez, 1955	Natural forest	1	1	October
Deltochilum howdeni Martínez, 1955	Natural forest	2	9	October
Deltochilum howdeni Martínez, 1955	Natural forest	3	8	October
Deltochilum howdeni Martínez, 1955	Natural forest	4	13	October
Deltochilum howdeni Martínez, 1955	Natural forest	4	2	October
Deltochilum howdeni Martínez, 1955	Natural forest	1	5	November
Deltochilum howdeni Martínez, 1955	Natural forest	1	1	November
Deltochilum howdeni Martínez, 1955	Natural forest	2	2	November
Deltochilum howdeni Martínez, 1955	Natural forest	2	3	November
Deltochilum howdeni Martínez, 1955	Natural forest	3	5	November
Deltochilum howdeni Martínez, 1955	Natural forest	3	1	November
Deltochilum howdeni Martínez, 1955	Natural forest	4	16	November
Deltochilum howdeni Martínez, 1955	Natural forest	4	2	November
Deltochilum howdeni Martínez, 1955	Sensitive ecosystems	4	1	November
Deltochilum howdeni Martínez, 1955	Natural forest	1	18	December
Deltochilum howdeni Martínez, 1955	Natural forest	1	4	December
Deltochilum howdeni Martínez, 1955	Natural forest	2	14	December
Deltochilum howdeni Martínez, 1955	Natural forest	2	1	December
Deltochilum howdeni Martínez, 1955	Natural forest	3	32	December
Deltochilum howdeni Martínez, 1955	Natural forest	3	2	December
Deltochilum howdeni Martínez, 1955	Natural forest	4	26	December
Deltochilum howdeni Martínez, 1955	Natural forest	4	3	December
Deltochilum howdeni Martínez, 1955	Sensitive ecosystems	2	1	December
Deltochilum howdeni Martínez, 1955	Natural forest	1	9	January 2019
Deltochilum howdeni Martínez, 1955	Natural forest	1	1	January 2019
Deltochilum howdeni Martínez, 1955	Natural forest	2	7	January 2019
Deltochilum howdeni Martínez, 1955	Natural forest	3	6	January 2019
Deltochilum howdeni Martínez, 1955	Natural forest	4	8	January 2019
Deltochilum howdeni Martínez, 1955	Natural forest	4	1	January 2019
Deltochilum howdeni Martínez, 1955	Sensitive ecosystems	4	1	January 2019
Dichotomius mamillatus Felsche,1901	Natural forest	1	1	March
Dichotomius mamillatus Felsche,1901	Natural forest	1	5	February
Dichotomius mamillatus Felsche,1901	Natural forest	1	1	March
Dichotomius mamillatus Felsche,1901	Natural forest	1	2	July
Dichotomius mamillatus Felsche,1901	Natural forest	2	8	February
Dichotomius mamillatus Felsche,1901	Natural forest	3	7	February
Dichotomius mamillatus Felsche,1901	Natural forest	3	3	March
Dichotomius mamillatus Felsche,1901	Natural forest	3	2	July
Dichotomius mamillatus Felsche,1901	Natural forest	4	18	February
Dichotomius mamillatus Felsche,1901	Natural forest	4	2	March
Dichotomius mamillatus Felsche,1901	Sensitive ecosystems	4	2	February
Dichotomius mamillatus Felsche,1901	Natural forest	1	3	August
Dichotomius mamillatus Felsche,1901	Natural forest	2	3	August
Dichotomius mamillatus Felsche,1901	Natural forest	3	1	August
Dichotomius mamillatus Felsche,1901	Natural forest	3	7	August
Dichotomius mamillatus Felsche,1901	Natural forest	4	1	August
Dichotomius mamillatus Felsche,1901	Natural forest	4	2	August
Dichotomius mamillatus Felsche,1901	Natural forest	3	2	September
Dichotomius mamillatus Felsche,1901	Natural forest	4	3	September
Dichotomius mamillatus Felsche,1901	Palm plantations	1	1	September
Dichotomius mamillatus Felsche,1901	Natural forest	1	1	October
Dichotomius mamillatus Felsche,1901	Natural forest	2	1	October
Dichotomius mamillatus Felsche,1901	Natural forest	2	5	October
Dichotomius mamillatus Felsche,1901	Natural forest	3	1	October
Dichotomius mamillatus Felsche,1901	Natural forest	3	1	October
Dichotomius mamillatus Felsche,1901	Natural forest	4	2	October
Dichotomius mamillatus Felsche,1901	Natural forest	1	1	November
Dichotomius mamillatus Felsche,1901	Natural forest	1	2	November
Dichotomius mamillatus Felsche,1901	Natural forest	2	1	November
Dichotomius mamillatus Felsche,1901	Natural forest	2	3	November
Dichotomius mamillatus Felsche,1901	Natural forest	3	6	November
Dichotomius mamillatus Felsche,1901	Natural forest	4	11	November
Dichotomius mamillatus Felsche,1901	Natural forest	1	3	December
Dichotomius mamillatus Felsche,1901	Natural forest	1	6	December
Dichotomius mamillatus Felsche,1901	Natural forest	2	8	December
Dichotomius mamillatus Felsche,1901	Natural forest	2	4	December
Dichotomius mamillatus Felsche,1901	Natural forest	3	3	December
Dichotomius mamillatus Felsche,1901	Natural forest	3	15	December
Dichotomius mamillatus Felsche,1901	Natural forest	3	1	December
Dichotomius mamillatus Felsche,1901	Natural forest	4	4	December
Dichotomius mamillatus Felsche,1901	Natural forest	4	19	December
Dichotomius mamillatus Felsche,1901	Natural forest	1	4	January 2019
Dichotomius mamillatus Felsche,1901	Natural forest	2	1	January 2019
Dichotomius mamillatus Felsche,1901	Natural forest	3	3	January 2019
Dichotomius mamillatus Felsche,1901	Natural forest	4	1	January 2019
Dichotomius mamillatus Felsche,1901	Natural forest	4	8	January 2019
Dichotomius ohausi Luederwaldt, 1923	Agricultural soils	1	1	June
Dichotomius ohausi Luederwaldt, 1923	Natural forest	1	4	February
Dichotomius ohausi Luederwaldt, 1923	Natural forest	1	2	March
Dichotomius ohausi Luederwaldt, 1923	Natural forest	1	1	June
Dichotomius ohausi Luederwaldt, 1923	Natural forest	1	3	July
Dichotomius ohausi Luederwaldt, 1923	Natural forest	1	2	February
Dichotomius ohausi Luederwaldt, 1923	Natural forest	1	3	March
Dichotomius ohausi Luederwaldt, 1923	Natural forest	1	3	May
Dichotomius ohausi Luederwaldt, 1923	Natural forest	1	1	June
Dichotomius ohausi Luederwaldt, 1923	Natural forest	1	2	February
Dichotomius ohausi Luederwaldt, 1923	Natural forest	1	4	March
Dichotomius ohausi Luederwaldt, 1923	Natural forest	1	1	May
Dichotomius ohausi Luederwaldt, 1923	Natural forest	1	1	June
Dichotomius ohausi Luederwaldt, 1923	Natural forest	1	1	July
Dichotomius ohausi Luederwaldt, 1923	Natural forest	2	5	February
Dichotomius ohausi Luederwaldt, 1923	Natural forest	2	1	March
Dichotomius ohausi Luederwaldt, 1923	Natural forest	2	4	May
Dichotomius ohausi Luederwaldt, 1923	Natural forest	2	1	June
Dichotomius ohausi Luederwaldt, 1923	Natural forest	2	1	July
Dichotomius ohausi Luederwaldt, 1923	Natural forest	2	3	February
Dichotomius ohausi Luederwaldt, 1923	Natural forest	2	1	March
Dichotomius ohausi Luederwaldt, 1923	Natural forest	2	1	June
Dichotomius ohausi Luederwaldt, 1923	Natural forest	2	5	July
Dichotomius ohausi Luederwaldt, 1923	Natural forest	2	3	February
Dichotomius ohausi Luederwaldt, 1923	Natural forest	2	3	March
Dichotomius ohausi Luederwaldt, 1923	Natural forest	2	3	May
Dichotomius ohausi Luederwaldt, 1923	Natural forest	2	2	June
Dichotomius ohausi Luederwaldt, 1923	Natural forest	2	2	July
Dichotomius ohausi Luederwaldt, 1923	Natural forest	3	8	February
Dichotomius ohausi Luederwaldt, 1923	Natural forest	3	2	March
Dichotomius ohausi Luederwaldt, 1923	Natural forest	3	10	May
Dichotomius ohausi Luederwaldt, 1923	Natural forest	3	2	June
Dichotomius ohausi Luederwaldt, 1923	Natural forest	3	2	July
Dichotomius ohausi Luederwaldt, 1923	Natural forest	3	3	February
Dichotomius ohausi Luederwaldt, 1923	Natural forest	3	3	May
Dichotomius ohausi Luederwaldt, 1923	Natural forest	3	1	June
Dichotomius ohausi Luederwaldt, 1923	Natural forest	3	2	July
Dichotomius ohausi Luederwaldt, 1923	Natural forest	3	1	February
Dichotomius ohausi Luederwaldt, 1923	Natural forest	3	1	March
Dichotomius ohausi Luederwaldt, 1923	Natural forest	3	5	July
Dichotomius ohausi Luederwaldt, 1923	Natural forest	4	4	February
Dichotomius ohausi Luederwaldt, 1923	Natural forest	4	4	March
Dichotomius ohausi Luederwaldt, 1923	Natural forest	4	1	May
Dichotomius ohausi Luederwaldt, 1923	Natural forest	4	2	June
Dichotomius ohausi Luederwaldt, 1923	Natural forest	4	3	February
Dichotomius ohausi Luederwaldt, 1923	Natural forest	4	5	March
Dichotomius ohausi Luederwaldt, 1923	Natural forest	4	2	June
Dichotomius ohausi Luederwaldt, 1923	Natural forest	4	1	July
Dichotomius ohausi Luederwaldt, 1923	Natural forest	4	6	February
Dichotomius ohausi Luederwaldt, 1923	Natural forest	4	1	June
Dichotomius ohausi Luederwaldt, 1923	Natural forest	4	1	July
Dichotomius ohausi Luederwaldt, 1923	Sensitive ecosystems	1	1	February
Dichotomius ohausi Luederwaldt, 1923	Sensitive ecosystems	3	1	March
Dichotomius ohausi Luederwaldt, 1923	Sensitive ecosystems	4	3	February
Dichotomius ohausi Luederwaldt, 1923	Sensitive ecosystems	4	2	March
Dichotomius ohausi Luederwaldt, 1923	Sensitive ecosystems	4	3	February
Dichotomius ohausi Luederwaldt, 1923	Sensitive ecosystems	4	5	March
Dichotomius ohausi Luederwaldt, 1923	Sensitive ecosystems	4	1	February
Dichotomius ohausi Luederwaldt, 1923	Sensitive ecosystems	4	1	March
Dichotomius ohausi Luederwaldt, 1923	Palm plantations	1	1	March
Dichotomius ohausi Luederwaldt, 1923	Palm plantations	1	1	May
Dichotomius ohausi Luederwaldt, 1923	Palm plantations	1	2	June
Dichotomius ohausi Luederwaldt, 1923	Palm plantations	1	1	February
Dichotomius ohausi Luederwaldt, 1923	Palm plantations	1	2	July
Dichotomius ohausi Luederwaldt, 1923	Palm plantations	2	2	February
Dichotomius ohausi Luederwaldt, 1923	Palm plantations	4	1	February
Dichotomius ohausi Luederwaldt, 1923	Palm plantations	4	1	June
Dichotomius ohausi Luederwaldt, 1923	Palm plantations	4	1	February
Dichotomius ohausi Luederwaldt, 1923	Palm plantations	4	1	March
Dichotomius ohausi Luederwaldt, 1923	Agricultural soils	2	1	August
Dichotomius ohausi Luederwaldt, 1923	Natural forest	1	5	August
Dichotomius ohausi Luederwaldt, 1923	Natural forest	1	3	August
Dichotomius ohausi Luederwaldt, 1923	Natural forest	1	7	August
Dichotomius ohausi Luederwaldt, 1923	Natural forest	2	11	August
Dichotomius ohausi Luederwaldt, 1923	Natural forest	2	14	August
Dichotomius ohausi Luederwaldt, 1923	Natural forest	2	9	August
Dichotomius ohausi Luederwaldt, 1923	Natural forest	3	16	August
Dichotomius ohausi Luederwaldt, 1923	Natural forest	3	31	August
Dichotomius ohausi Luederwaldt, 1923	Natural forest	3	19	August
Dichotomius ohausi Luederwaldt, 1923	Natural forest	4	2	August
Dichotomius ohausi Luederwaldt, 1923	Natural forest	4	4	August
Dichotomius ohausi Luederwaldt, 1923	Natural forest	4	2	August
Dichotomius ohausi Luederwaldt, 1923	Palm plantations	1	1	August
Dichotomius ohausi Luederwaldt, 1923	Palm plantations	1	2	August
Dichotomius ohausi Luederwaldt, 1923	Palm plantations	2	1	August
Dichotomius ohausi Luederwaldt, 1923	Palm plantations	3	1	August
Dichotomius ohausi Luederwaldt, 1923	Palm plantations	3	1	August
Dichotomius ohausi Luederwaldt, 1923	Palm plantations	4	1	August
Dichotomius ohausi Luederwaldt, 1923	Palm plantations	4	2	August
Dichotomius ohausi Luederwaldt, 1923	Natural forest	1	5	September
Dichotomius ohausi Luederwaldt, 1923	Natural forest	1	15	September
Dichotomius ohausi Luederwaldt, 1923	Natural forest	1	4	September
Dichotomius ohausi Luederwaldt, 1923	Natural forest	2	8	September
Dichotomius ohausi Luederwaldt, 1923	Natural forest	2	14	September
Dichotomius ohausi Luederwaldt, 1923	Natural forest	2	4	September
Dichotomius ohausi Luederwaldt, 1923	Natural forest	3	1	September
Dichotomius ohausi Luederwaldt, 1923	Natural forest	3	14	September
Dichotomius ohausi Luederwaldt, 1923	Natural forest	3	3	September
Dichotomius ohausi Luederwaldt, 1923	Natural forest	4	11	September
Dichotomius ohausi Luederwaldt, 1923	Natural forest	4	2	September
Dichotomius ohausi Luederwaldt, 1923	Palm plantations	1	2	September
Dichotomius ohausi Luederwaldt, 1923	Palm plantations	2	2	September
Dichotomius ohausi Luederwaldt, 1923	Palm plantations	3	1	September
Dichotomius ohausi Luederwaldt, 1923	Palm plantations	4	1	September
Dichotomius ohausi Luederwaldt, 1923	Agricultural soils	1	1	October
Dichotomius ohausi Luederwaldt, 1923	Natural forest	1	3	October
Dichotomius ohausi Luederwaldt, 1923	Natural forest	1	7	October
Dichotomius ohausi Luederwaldt, 1923	Natural forest	1	3	October
Dichotomius ohausi Luederwaldt, 1923	Natural forest	2	5	October
Dichotomius ohausi Luederwaldt, 1923	Natural forest	2	3	October
Dichotomius ohausi Luederwaldt, 1923	Natural forest	2	6	October
Dichotomius ohausi Luederwaldt, 1923	Natural forest	3	1	October
Dichotomius ohausi Luederwaldt, 1923	Natural forest	3	19	October
Dichotomius ohausi Luederwaldt, 1923	Natural forest	4	1	October
Dichotomius ohausi Luederwaldt, 1923	Natural forest	4	2	October
Dichotomius ohausi Luederwaldt, 1923	Natural forest	4	20	October
Dichotomius ohausi Luederwaldt, 1923	Palm plantations	1	2	October
Dichotomius ohausi Luederwaldt, 1923	Palm plantations	2	1	October
Dichotomius ohausi Luederwaldt, 1923	Palm plantations	3	1	October
Dichotomius ohausi Luederwaldt, 1923	Agricultural soils	1	2	November
Dichotomius ohausi Luederwaldt, 1923	Agricultural soils	4	1	November
Dichotomius ohausi Luederwaldt, 1923	Natural forest	1	7	November
Dichotomius ohausi Luederwaldt, 1923	Natural forest	1	14	November
Dichotomius ohausi Luederwaldt, 1923	Natural forest	2	2	November
Dichotomius ohausi Luederwaldt, 1923	Natural forest	2	7	November
Dichotomius ohausi Luederwaldt, 1923	Natural forest	2	17	November
Dichotomius ohausi Luederwaldt, 1923	Natural forest	3	5	November
Dichotomius ohausi Luederwaldt, 1923	Natural forest	3	8	November
Dichotomius ohausi Luederwaldt, 1923	Natural forest	3	4	November
Dichotomius ohausi Luederwaldt, 1923	Natural forest	4	8	November
Dichotomius ohausi Luederwaldt, 1923	Natural forest	4	8	November
Dichotomius ohausi Luederwaldt, 1923	Natural forest	4	11	November
Dichotomius ohausi Luederwaldt, 1923	Palm plantations	2	4	November
Dichotomius ohausi Luederwaldt, 1923	Palm plantations	2	2	November
Dichotomius ohausi Luederwaldt, 1923	Palm plantations	3	2	November
Dichotomius ohausi Luederwaldt, 1923	Palm plantations	3	3	November
Dichotomius ohausi Luederwaldt, 1923	Palm plantations	3	1	November
Dichotomius ohausi Luederwaldt, 1923	Palm plantations	4	2	November
Dichotomius ohausi Luederwaldt, 1923	Palm plantations	4	1	November
Dichotomius ohausi Luederwaldt, 1923	Palm plantations	4	1	November
Dichotomius ohausi Luederwaldt, 1923	Agricultural soils	3	1	December
Dichotomius ohausi Luederwaldt, 1923	Natural forest	1	8	December
Dichotomius ohausi Luederwaldt, 1923	Natural forest	1	8	December
Dichotomius ohausi Luederwaldt, 1923	Natural forest	1	12	December
Dichotomius ohausi Luederwaldt, 1923	Natural forest	2	5	December
Dichotomius ohausi Luederwaldt, 1923	Natural forest	2	3	December
Dichotomius ohausi Luederwaldt, 1923	Natural forest	2	7	December
Dichotomius ohausi Luederwaldt, 1923	Natural forest	3	7	December
Dichotomius ohausi Luederwaldt, 1923	Natural forest	3	9	December
Dichotomius ohausi Luederwaldt, 1923	Natural forest	3	5	December
Dichotomius ohausi Luederwaldt, 1923	Natural forest	4	5	December
Dichotomius ohausi Luederwaldt, 1923	Natural forest	4	5	December
Dichotomius ohausi Luederwaldt, 1923	Natural forest	4	6	December
Dichotomius ohausi Luederwaldt, 1923	Palm plantations	1	1	December
Dichotomius ohausi Luederwaldt, 1923	Palm plantations	1	1	December
Dichotomius ohausi Luederwaldt, 1923	Palm plantations	2	2	December
Dichotomius ohausi Luederwaldt, 1923	Palm plantations	3	4	December
Dichotomius ohausi Luederwaldt, 1923	Palm plantations	3	5	December
Dichotomius ohausi Luederwaldt, 1923	Natural forest	1	7	January 2019
Dichotomius ohausi Luederwaldt, 1923	Natural forest	1	13	January 2019
Dichotomius ohausi Luederwaldt, 1923	Natural forest	1	3	January 2019
Dichotomius ohausi Luederwaldt, 1923	Natural forest	2	3	January 2019
Dichotomius ohausi Luederwaldt, 1923	Natural forest	2	3	January 2019
Dichotomius ohausi Luederwaldt, 1923	Natural forest	2	10	January 2019
Dichotomius ohausi Luederwaldt, 1923	Natural forest	3	3	January 2019
Dichotomius ohausi Luederwaldt, 1923	Natural forest	3	3	January 2019
Dichotomius ohausi Luederwaldt, 1923	Natural forest	3	7	January 2019
Dichotomius ohausi Luederwaldt, 1923	Natural forest	4	1	January 2019
Dichotomius ohausi Luederwaldt, 1923	Natural forest	4	4	January 2019
Dichotomius ohausi Luederwaldt, 1923	Natural forest	4	4	January 2019
Dichotomius ohausi Luederwaldt, 1923	Palm plantations	2	4	January 2019
Dichotomius ohausi Luederwaldt, 1923	Palm plantations	2	1	January 2019
Dichotomius ohausi Luederwaldt, 1923	Palm plantations	3	2	January 2019
Dichotomius ohausi Luederwaldt, 1923	Palm plantations	3	1	January 2019
Dichotomius ohausi Luederwaldt, 1923	Palm plantations	4	3	January 2019
Dichotomius podalirius Felsche, 1901	Natural forest	1	4	February
Dichotomius podalirius Felsche, 1901	Natural forest	1	2	March
Dichotomius podalirius Felsche, 1901	Natural forest	2	1	July
Dichotomius podalirius Felsche, 1901	Natural forest	2	7	February
Dichotomius podalirius Felsche, 1901	Natural forest	2	1	July
Dichotomius podalirius Felsche, 1901	Natural forest	3	2	February
Dichotomius podalirius Felsche, 1901	Natural forest	3	3	March
Dichotomius podalirius Felsche, 1901	Natural forest	4	5	February
Dichotomius podalirius Felsche, 1901	Natural forest	4	2	March
Dichotomius podalirius Felsche, 1901	Natural forest	4	2	September
Dichotomius podalirius Felsche, 1901	Natural forest	1	1	October
Dichotomius podalirius Felsche, 1901	Natural forest	2	1	October
Dichotomius podalirius Felsche, 1901	Natural forest	4	1	October
Dichotomius podalirius Felsche, 1901	Natural forest	4	1	October
Dichotomius podalirius Felsche, 1901	Natural forest	2	1	November
Dichotomius podalirius Felsche, 1901	Natural forest	2	3	December
Dichotomius podalirius Felsche, 1901	Natural forest	3	2	December
Dichotomius podalirius Felsche, 1901	Natural forest	4	2	December
Dichotomius podalirius Felsche, 1901	Natural forest	4	8	December
Dichotomius sp1	Natural forest	1	17	February
Dichotomius sp1	Natural forest	1	4	March
Dichotomius sp1	Natural forest	1	1	July
Dichotomius sp1	Natural forest	2	1	July
Dichotomius sp1	Natural forest	2	11	February
Dichotomius sp1	Natural forest	2	3	March
Dichotomius sp1	Natural forest	2	1	July
Dichotomius sp1	Natural forest	3	2	February
Dichotomius sp1	Natural forest	3	13	February
Dichotomius sp1	Natural forest	3	2	March
Dichotomius sp1	Natural forest	3	4	July
Dichotomius sp1	Natural forest	3	1	February
Dichotomius sp1	Natural forest	4	1	February
Dichotomius sp1	Natural forest	4	6	February
Dichotomius sp1	Natural forest	4	1	March
Dichotomius sp1	Natural forest	4	1	July
Dichotomius sp1	Natural forest	4	1	February
Dichotomius sp1	Natural forest	1	1	August
Dichotomius sp1	Natural forest	2	6	August
Dichotomius sp1	Natural forest	2	1	August
Dichotomius sp1	Natural forest	3	10	August
Dichotomius sp1	Natural forest	4	6	August
Dichotomius sp1	Natural forest	4	1	August
Dichotomius sp1	Natural forest	1	5	September
Dichotomius sp1	Natural forest	2	2	September
Dichotomius sp1	Natural forest	3	2	September
Dichotomius sp1	Natural forest	4	1	September
Dichotomius sp1	Natural forest	1	2	October
Dichotomius sp1	Natural forest	1	2	October
Dichotomius sp1	Natural forest	2	11	October
Dichotomius sp1	Natural forest	3	2	October
Dichotomius sp1	Palm plantations	3	1	October
Dichotomius sp1	Natural forest	1	5	November
Dichotomius sp1	Natural forest	1	3	November
Dichotomius sp1	Natural forest	2	3	November
Dichotomius sp1	Natural forest	2	3	November
Dichotomius sp1	Natural forest	3	7	November
Dichotomius sp1	Natural forest	3	1	November
Dichotomius sp1	Natural forest	4	3	November
Dichotomius sp1	Natural forest	1	15	December
Dichotomius sp1	Natural forest	2	7	December
Dichotomius sp1	Natural forest	2	13	December
Dichotomius sp1	Natural forest	2	1	December
Dichotomius sp1	Natural forest	3	4	December
Dichotomius sp1	Natural forest	3	17	December
Dichotomius sp1	Natural forest	4	1	December
Dichotomius sp1	Natural forest	4	17	December
Dichotomius sp1	Natural forest	1	4	January 2019
Dichotomius sp1	Natural forest	2	1	January 2019
Dichotomius sp1	Natural forest	3	4	January 2019
Dichotomius sp1	Natural forest	4	1	January 2019
Eurysternus atrosericus Génier, 2009	Natural forest	1	6	February
Eurysternus atrosericus Génier, 2009	Natural forest	1	3	March
Eurysternus atrosericus Génier, 2009	Natural forest	2	1	February
Eurysternus atrosericus Génier, 2009	Natural forest	2	1	March
Eurysternus atrosericus Génier, 2009	Natural forest	2	1	July
Eurysternus atrosericus Génier, 2009	Natural forest	4	3	February
Eurysternus atrosericus Génier, 2009	Sensitive ecosystems	4	2	March
Eurysternus atrosericus Génier, 2009	Natural forest	3	1	August
Eurysternus atrosericus Génier, 2009	Natural forest	1	3	September
Eurysternus atrosericus Génier, 2009	Natural forest	1	2	September
Eurysternus atrosericus Génier, 2009	Natural forest	2	1	September
Eurysternus atrosericus Génier, 2009	Natural forest	3	1	September
Eurysternus atrosericus Génier, 2009	Natural forest	1	1	October
Eurysternus atrosericus Génier, 2009	Natural forest	1	2	October
Eurysternus atrosericus Génier, 2009	Natural forest	1	8	October
Eurysternus atrosericus Génier, 2009	Natural forest	2	3	October
Eurysternus atrosericus Génier, 2009	Natural forest	2	7	October
Eurysternus atrosericus Génier, 2009	Natural forest	3	4	October
Eurysternus atrosericus Génier, 2009	Natural forest	4	2	October
Eurysternus atrosericus Génier, 2009	Palm plantations	1	1	October
Eurysternus atrosericus Génier, 2009	Palm plantations	4	1	October
Eurysternus atrosericus Génier, 2009	Agricultural soils	4	1	November
Eurysternus atrosericus Génier, 2009	Natural forest	1	1	November
Eurysternus atrosericus Génier, 2009	Natural forest	2	1	November
Eurysternus atrosericus Génier, 2009	Natural forest	2	3	November
Eurysternus atrosericus Génier, 2009	Natural forest	2	1	November
Eurysternus atrosericus Génier, 2009	Natural forest	3	2	November
Eurysternus atrosericus Génier, 2009	Natural forest	4	3	November
Eurysternus atrosericus Génier, 2009	Sensitive ecosystems	3	1	November
Eurysternus atrosericus Génier, 2009	Sensitive ecosystems	4	2	November
Eurysternus atrosericus Génier, 2009	Palm plantations	1	2	November
Eurysternus atrosericus Génier, 2009	Palm plantations	3	1	November
Eurysternus atrosericus Génier, 2009	Natural forest	1	6	December
Eurysternus atrosericus Génier, 2009	Natural forest	1	11	December
Eurysternus atrosericus Génier, 2009	Natural forest	1	1	December
Eurysternus atrosericus Génier, 2009	Natural forest	2	11	December
Eurysternus atrosericus Génier, 2009	Natural forest	2	14	December
Eurysternus atrosericus Génier, 2009	Natural forest	3	1	December
Eurysternus atrosericus Génier, 2009	Natural forest	3	6	December
Eurysternus atrosericus Génier, 2009	Natural forest	4	1	December
Eurysternus atrosericus Génier, 2009	Natural forest	4	6	December
Eurysternus atrosericus Génier, 2009	Natural forest	4	1	December
Eurysternus atrosericus Génier, 2009	Natural forest	1	1	January 2019
Eurysternus atrosericus Génier, 2009	Natural forest	1	11	January 2019
Eurysternus atrosericus Génier, 2009	Natural forest	2	1	January 2019
Eurysternus atrosericus Génier, 2009	Natural forest	3	1	January 2019
Eurysternus atrosericus Génier, 2009	Natural forest	4	1	January 2019
Eurysternus caribaeus (Herbst, 1789)	Natural forest	1	2	August
Eurysternus caribaeus (Herbst, 1789)	Natural forest	2	2	August
Eurysternus caribaeus (Herbst, 1789)	Natural forest	1	1	September
Eurysternus caribaeus (Herbst, 1789)	Natural forest	2	1	September
Eurysternus caribaeus (Herbst, 1789)	Natural forest	1	1	October
Eurysternus caribaeus (Herbst, 1789)	Natural forest	1	5	October
Eurysternus caribaeus (Herbst, 1789)	Natural forest	2	3	October
Eurysternus caribaeus (Herbst, 1789)	Natural forest	2	6	October
Eurysternus caribaeus (Herbst, 1789)	Natural forest	3	3	October
Eurysternus caribaeus (Herbst, 1789)	Natural forest	3	12	October
Eurysternus caribaeus (Herbst, 1789)	Natural forest	4	3	October
Eurysternus caribaeus (Herbst, 1789)	Natural forest	1	1	November
Eurysternus caribaeus (Herbst, 1789)	Natural forest	2	1	November
Eurysternus caribaeus (Herbst, 1789)	Natural forest	2	3	November
Eurysternus caribaeus (Herbst, 1789)	Natural forest	4	1	November
Eurysternus caribaeus (Herbst, 1789)	Natural forest	4	1	November
Eurysternus caribaeus (Herbst, 1789)	Agricultural soils	2	3	December
Eurysternus caribaeus (Herbst, 1789)	Natural forest	1	2	December
Eurysternus caribaeus (Herbst, 1789)	Natural forest	2	3	December
Eurysternus caribaeus (Herbst, 1789)	Natural forest	2	3	December
Eurysternus caribaeus (Herbst, 1789)	Natural forest	3	8	December
Eurysternus caribaeus (Herbst, 1789)	Natural forest	4	2	December
Eurysternus caribaeus (Herbst, 1789)	Natural forest	4	4	December
Eurysternus caribaeus (Herbst, 1789)	Palm plantations	1	1	December
Eurysternus caribaeus (Herbst, 1789)	Palm plantations	1	2	December
Eurysternus caribaeus (Herbst, 1789)	Palm plantations	2	1	December
Eurysternus caribaeus (Herbst, 1789)	Palm plantations	2	1	December
Eurysternus caribaeus (Herbst, 1789)	Palm plantations	3	5	December
Eurysternus caribaeus (Herbst, 1789)	Palm plantations	4	1	December
Eurysternus caribaeus (Herbst, 1789)	Agricultural soils	3	1	January 2019
Eurysternus caribaeus (Herbst, 1789)	Natural forest	1	3	January 2019
Eurysternus caribaeus (Herbst, 1789)	Natural forest	2	1	January 2019
Eurysternus caribaeus (Herbst, 1789)	Natural forest	2	2	January 2019
Eurysternus caribaeus (Herbst, 1789)	Natural forest	4	2	January 2019
Eurysternus caribaeus (Herbst, 1789)	Palm plantations	4	2	January 2019
Eurysternus foedus Guérin-Méneville, 1844	Natural forest	1	1	February
Eurysternus foedus Guérin-Méneville, 1844	Natural forest	1	1	March
Eurysternus foedus Guérin-Méneville, 1844	Natural forest	1	1	July
Eurysternus foedus Guérin-Méneville, 1844	Natural forest	2	1	March
Eurysternus foedus Guérin-Méneville, 1844	Natural forest	3	1	February
Eurysternus foedus Guérin-Méneville, 1844	Natural forest	4	4	February
Eurysternus foedus Guérin-Méneville, 1844	Sensitive ecosystems	1	1	February
Eurysternus foedus Guérin-Méneville, 1844	Palm plantations	3	1	July
Eurysternus foedus Guérin-Méneville, 1844	Palm plantations	4	2	February
Eurysternus foedus Guérin-Méneville, 1844	Natural forest	4	1	August
Eurysternus foedus Guérin-Méneville, 1844	Natural forest	4	1	August
Eurysternus foedus Guérin-Méneville, 1844	Agricultural soils	4	1	October
Eurysternus foedus Guérin-Méneville, 1844	Natural forest	1	2	October
Eurysternus foedus Guérin-Méneville, 1844	Agricultural soils	2	1	December
Eurysternus foedus Guérin-Méneville, 1844	Agricultural soils	3	1	December
Eurysternus foedus Guérin-Méneville, 1844	Natural forest	1	2	December
Eurysternus foedus Guérin-Méneville, 1844	Natural forest	2	1	December
Eurysternus foedus Guérin-Méneville, 1844	Natural forest	2	4	December
Eurysternus foedus Guérin-Méneville, 1844	Natural forest	3	7	December
Eurysternus foedus Guérin-Méneville, 1844	Natural forest	4	3	December
Eurysternus foedus Guérin-Méneville, 1844	Palm plantations	2	1	December
Eurysternus foedus Guérin-Méneville, 1844	Palm plantations	3	2	December
Eurysternus hamaticollis Balthasar, 1939	Natural forest	1	2	October
Eurysternus hamaticollis Balthasar, 1939	Natural forest	1	1	November
Eurysternus hamaticollis Balthasar, 1939	Natural forest	2	4	November
Eurysternus hamaticollis Balthasar, 1939	Natural forest	4	1	November
Eurysternus hamaticollis Balthasar, 1939	Natural forest	3	1	November
Eurysternus hamaticollis Balthasar, 1939	Sensitive ecosystems	3	1	November
Eurysternus hamaticollis Balthasar, 1939	Natural forest	1	2	December
Eurysternus hamaticollis Balthasar, 1939	Natural forest	2	3	December
Eurysternus hamaticollis Balthasar, 1939	Natural forest	3	4	December
Eurysternus hamaticollis Balthasar, 1939	Natural forest	4	1	December
Eurysternus hamaticollis Balthasar, 1939	Palm plantations	1	1	December
Eurysternus plebejus Harold, 1880	Natural forest	1	1	March
Eurysternus plebejus Harold, 1880	Natural forest	1	1	July
Eurysternus plebejus Harold, 1880	Natural forest	1	56	February
Eurysternus plebejus Harold, 1880	Natural forest	1	10	March
Eurysternus plebejus Harold, 1880	Natural forest	1	3	July
Eurysternus plebejus Harold, 1880	Natural forest	1	2	February
Eurysternus plebejus Harold, 1880	Natural forest	2	2	May
Eurysternus plebejus Harold, 1880	Natural forest	2	32	February
Eurysternus plebejus Harold, 1880	Natural forest	2	5	March
Eurysternus plebejus Harold, 1880	Natural forest	2	1	July
Eurysternus plebejus Harold, 1880	Natural forest	3	1	July
Eurysternus plebejus Harold, 1880	Natural forest	3	11	February
Eurysternus plebejus Harold, 1880	Natural forest	3	1	March
Eurysternus plebejus Harold, 1880	Natural forest	4	33	February
Eurysternus plebejus Harold, 1880	Natural forest	4	1	March
Eurysternus plebejus Harold, 1880	Sensitive ecosystems	3	1	July
Eurysternus plebejus Harold, 1880	Sensitive ecosystems	4	2	February
Eurysternus plebejus Harold, 1880	Sensitive ecosystems	4	1	July
Eurysternus plebejus Harold, 1880	Palm plantations	1	3	July
Eurysternus plebejus Harold, 1880	Palm plantations	2	1	March
Eurysternus plebejus Harold, 1880	Palm plantations	3	2	February
Eurysternus plebejus Harold, 1880	Palm plantations	3	3	March
Eurysternus plebejus Harold, 1880	Palm plantations	4	1	July
Eurysternus plebejus Harold, 1880	Natural forest	1	1	October
Eurysternus plebejus Harold, 1880	Natural forest	2	2	October
Eurysternus plebejus Harold, 1880	Natural forest	1	2	November
Eurysternus plebejus Harold, 1880	Natural forest	3	1	November
Eurysternus plebejus Harold, 1880	Palm plantations	1	1	November
Eurysternus plebejus Harold, 1880	Agricultural soils	1	1	December
Eurysternus plebejus Harold, 1880	Agricultural soils	3	3	December
Eurysternus plebejus Harold, 1880	Agricultural soils	4	2	December
Eurysternus plebejus Harold, 1880	Natural forest	1	3	December
Eurysternus plebejus Harold, 1880	Natural forest	1	36	December
Eurysternus plebejus Harold, 1880	Natural forest	2	102	December
Eurysternus plebejus Harold, 1880	Natural forest	3	4	December
Eurysternus plebejus Harold, 1880	Natural forest	3	29	December
Eurysternus plebejus Harold, 1880	Natural forest	3	1	December
Eurysternus plebejus Harold, 1880	Natural forest	4	1	December
Eurysternus plebejus Harold, 1880	Natural forest	4	15	December
Eurysternus plebejus Harold, 1880	Palm plantations	1	1	December
Eurysternus plebejus Harold, 1880	Palm plantations	1	3	December
Eurysternus plebejus Harold, 1880	Palm plantations	1	2	December
Eurysternus plebejus Harold, 1880	Palm plantations	2	1	December
Eurysternus plebejus Harold, 1880	Palm plantations	2	2	December
Eurysternus plebejus Harold, 1880	Palm plantations	3	4	December
Eurysternus plebejus Harold, 1880	Palm plantations	4	1	December
Eurysternus plebejus Harold, 1880	Palm plantations	4	4	December
Eurysternus plebejus Harold, 1880	Natural forest	1	29	January 2019
Eurysternus plebejus Harold, 1880	Palm plantations	4	1	January 2019
Eurysternus squamosus Génier, 2009	Natural forest	1	7	February
Eurysternus squamosus Génier, 2009	Natural forest	1	1	March
Eurysternus squamosus Génier, 2009	Natural forest	1	1	July
Eurysternus squamosus Génier, 2009	Natural forest	2	1	February
Eurysternus squamosus Génier, 2009	Natural forest	2	2	May
Eurysternus squamosus Génier, 2009	Natural forest	2	10	February
Eurysternus squamosus Génier, 2009	Natural forest	2	1	March
Eurysternus squamosus Génier, 2009	Natural forest	2	1	June
Eurysternus squamosus Génier, 2009	Natural forest	2	1	July
Eurysternus squamosus Génier, 2009	Natural forest	3	1	March
Eurysternus squamosus Génier, 2009	Natural forest	4	1	February
Eurysternus squamosus Génier, 2009	Natural forest	1	2	September
Eurysternus squamosus Génier, 2009	Natural forest	2	3	September
Eurysternus squamosus Génier, 2009	Natural forest	4	1	September
Eurysternus squamosus Génier, 2009	Natural forest	1	1	October
Eurysternus squamosus Génier, 2009	Natural forest	1	6	October
Eurysternus squamosus Génier, 2009	Natural forest	1	3	October
Eurysternus squamosus Génier, 2009	Natural forest	2	13	October
Eurysternus squamosus Génier, 2009	Natural forest	3	1	October
Eurysternus squamosus Génier, 2009	Natural forest	3	2	October
Eurysternus squamosus Génier, 2009	Natural forest	4	1	October
Eurysternus squamosus Génier, 2009	Natural forest	1	2	November
Eurysternus squamosus Génier, 2009	Natural forest	2	4	November
Eurysternus squamosus Génier, 2009	Natural forest	1	4	December
Eurysternus squamosus Génier, 2009	Natural forest	1	6	December
Eurysternus squamosus Génier, 2009	Natural forest	2	8	December
Eurysternus squamosus Génier, 2009	Natural forest	2	7	December
Eurysternus squamosus Génier, 2009	Natural forest	2	1	December
Eurysternus squamosus Génier, 2009	Natural forest	3	3	December
Eurysternus squamosus Génier, 2009	Natural forest	3	4	December
Eurysternus squamosus Génier, 2009	Natural forest	3	1	December
Eurysternus squamosus Génier, 2009	Natural forest	4	1	December
Eurysternus squamosus Génier, 2009	Natural forest	1	2	January 2019
Eurysternus squamosus Génier, 2009	Natural forest	1	4	January 2019
Eurysternus wittmerorum Martínez, 1988	Agricultural soils	4	1	July
Eurysternus wittmerorum Martínez, 1988	Natural forest	1	1	May
Eurysternus wittmerorum Martínez, 1988	Natural forest	1	6	February
Eurysternus wittmerorum Martínez, 1988	Natural forest	1	1	March
Eurysternus wittmerorum Martínez, 1988	Natural forest	1	1	July
Eurysternus wittmerorum Martínez, 1988	Natural forest	2	1	February
Eurysternus wittmerorum Martínez, 1988	Natural forest	2	5	March
Eurysternus wittmerorum Martínez, 1988	Natural forest	2	3	July
Eurysternus wittmerorum Martínez, 1988	Natural forest	3	4	July
Eurysternus wittmerorum Martínez, 1988	Natural forest	4	2	February
Eurysternus wittmerorum Martínez, 1988	Natural forest	4	1	March
Eurysternus wittmerorum Martínez, 1988	Natural forest	4	1	June
Eurysternus wittmerorum Martínez, 1988	Sensitive ecosystems	1	1	March
Eurysternus wittmerorum Martínez, 1988	Sensitive ecosystems	2	1	March
Eurysternus wittmerorum Martínez, 1988	Sensitive ecosystems	4	1	February
Eurysternus wittmerorum Martínez, 1988	Sensitive ecosystems	4	4	March
Eurysternus wittmerorum Martínez, 1988	Palm plantations	1	1	February
Eurysternus wittmerorum Martínez, 1988	Palm plantations	1	2	March
Eurysternus wittmerorum Martínez, 1988	Palm plantations	2	1	February
Eurysternus wittmerorum Martínez, 1988	Palm plantations	3	1	July
Eurysternus wittmerorum Martínez, 1988	Natural forest	1	1	August
Eurysternus wittmerorum Martínez, 1988	Natural forest	1	1	August
Eurysternus wittmerorum Martínez, 1988	Natural forest	3	1	September
Eurysternus wittmerorum Martínez, 1988	Natural forest	1	3	October
Eurysternus wittmerorum Martínez, 1988	Natural forest	1	9	October
Eurysternus wittmerorum Martínez, 1988	Natural forest	1	3	October
Eurysternus wittmerorum Martínez, 1988	Natural forest	2	1	October
Eurysternus wittmerorum Martínez, 1988	Natural forest	2	6	October
Eurysternus wittmerorum Martínez, 1988	Natural forest	4	1	October
Eurysternus wittmerorum Martínez, 1988	Palm plantations	1	3	October
Eurysternus wittmerorum Martínez, 1988	Palm plantations	3	1	October
Eurysternus wittmerorum Martínez, 1988	Palm plantations	4	1	October
Eurysternus wittmerorum Martínez, 1988	Natural forest	1	3	November
Eurysternus wittmerorum Martínez, 1988	Natural forest	2	1	November
Eurysternus wittmerorum Martínez, 1988	Natural forest	2	2	November
Eurysternus wittmerorum Martínez, 1988	Natural forest	3	1	November
Eurysternus wittmerorum Martínez, 1988	Natural forest	4	1	November
Eurysternus wittmerorum Martínez, 1988	Natural forest	4	1	November
Malagoniella astyanax Halffter, Pereira & Martínez, 1960	Natural forest	1	1	February
Malagoniella astyanax Halffter, Pereira & Martínez, 1960	Natural forest	3	1	December
Ontherus sulcatur Fabricius, 1775	Agricultural soils	1	2	March
Ontherus sulcatur Fabricius, 1775	Agricultural soils	2	1	February
Ontherus sulcatur Fabricius, 1775	Agricultural soils	3	1	March
Ontherus sulcatur Fabricius, 1775	Natural forest	1	5	February
Ontherus sulcatur Fabricius, 1775	Natural forest	1	1	March
Ontherus sulcatur Fabricius, 1775	Natural forest	1	3	July
Ontherus sulcatur Fabricius, 1775	Natural forest	2	9	February
Ontherus sulcatur Fabricius, 1775	Natural forest	2	2	July
Ontherus sulcatur Fabricius, 1775	Natural forest	3	9	February
Ontherus sulcatur Fabricius, 1775	Natural forest	3	1	March
Ontherus sulcatur Fabricius, 1775	Natural forest	3	1	July
Ontherus sulcatur Fabricius, 1775	Natural forest	4	37	February
Ontherus sulcatur Fabricius, 1775	Natural forest	4	2	March
Ontherus sulcatur Fabricius, 1775	Natural forest	4	1	July
Ontherus sulcatur Fabricius, 1775	Sensitive ecosystems	1	102	February
Ontherus sulcatur Fabricius, 1775	Sensitive ecosystems	1	4	March
Ontherus sulcatur Fabricius, 1775	Sensitive ecosystems	1	1	July
Ontherus sulcatur Fabricius, 1775	Sensitive ecosystems	2	107	February
Ontherus sulcatur Fabricius, 1775	Sensitive ecosystems	2	6	March
Ontherus sulcatur Fabricius, 1775	Sensitive ecosystems	3	1	May
Ontherus sulcatur Fabricius, 1775	Sensitive ecosystems	3	120	February
Ontherus sulcatur Fabricius, 1775	Sensitive ecosystems	3	90	July
Ontherus sulcatur Fabricius, 1775	Sensitive ecosystems	4	102	February
Ontherus sulcatur Fabricius, 1775	Sensitive ecosystems	4	48	March
Ontherus sulcatur Fabricius, 1775	Sensitive ecosystems	4	31	July
Ontherus sulcatur Fabricius, 1775	Sensitive ecosystems	4	1	July
Ontherus sulcatur Fabricius, 1775	Palm plantations	1	2	February
Ontherus sulcatur Fabricius, 1775	Palm plantations	1	1	March
Ontherus sulcatur Fabricius, 1775	Palm plantations	1	4	July
Ontherus sulcatur Fabricius, 1775	Palm plantations	2	2	February
Ontherus sulcatur Fabricius, 1775	Palm plantations	2	2	July
Ontherus sulcatur Fabricius, 1775	Palm plantations	3	3	February
Ontherus sulcatur Fabricius, 1775	Palm plantations	3	1	March
Ontherus sulcatur Fabricius, 1775	Palm plantations	3	7	July
Ontherus sulcatur Fabricius, 1775	Palm plantations	4	8	February
Ontherus sulcatur Fabricius, 1775	Palm plantations	4	1	March
Ontherus sulcatur Fabricius, 1775	Natural forest	2	1	August
Ontherus sulcatur Fabricius, 1775	Natural forest	3	5	August
Ontherus sulcatur Fabricius, 1775	Palm plantations	1	1	August
Ontherus sulcatur Fabricius, 1775	Palm plantations	2	1	August
Ontherus sulcatur Fabricius, 1775	Palm plantations	4	1	August
Ontherus sulcatur Fabricius, 1775	Agricultural soils	2	1	September
Ontherus sulcatur Fabricius, 1775	Natural forest	4	1	September
Ontherus sulcatur Fabricius, 1775	Sensitive ecosystems	3	1	September
Ontherus sulcatur Fabricius, 1775	Agricultural soils	3	1	October
Ontherus sulcatur Fabricius, 1775	Natural forest	2	4	October
Ontherus sulcatur Fabricius, 1775	Natural forest	4	1	October
Ontherus sulcatur Fabricius, 1775	Sensitive ecosystems	1	1	October
Ontherus sulcatur Fabricius, 1775	Sensitive ecosystems	3	6	October
Ontherus sulcatur Fabricius, 1775	Sensitive ecosystems	3	19	October
Ontherus sulcatur Fabricius, 1775	Sensitive ecosystems	4	5	October
Ontherus sulcatur Fabricius, 1775	Palm plantations	1	1	October
Ontherus sulcatur Fabricius, 1775	Palm plantations	3	3	October
Ontherus sulcatur Fabricius, 1775	Agricultural soils	4	2	November
Ontherus sulcatur Fabricius, 1775	Natural forest	1	4	November
Ontherus sulcatur Fabricius, 1775	Natural forest	2	1	November
Ontherus sulcatur Fabricius, 1775	Natural forest	2	1	November
Ontherus sulcatur Fabricius, 1775	Natural forest	3	1	November
Ontherus sulcatur Fabricius, 1775	Natural forest	3	2	November
Ontherus sulcatur Fabricius, 1775	Natural forest	4	4	November
Ontherus sulcatur Fabricius, 1775	Sensitive ecosystems	1	4	November
Ontherus sulcatur Fabricius, 1775	Sensitive ecosystems	2	7	November
Ontherus sulcatur Fabricius, 1775	Sensitive ecosystems	3	1	November
Ontherus sulcatur Fabricius, 1775	Sensitive ecosystems	3	31	November
Ontherus sulcatur Fabricius, 1775	Sensitive ecosystems	4	2	November
Ontherus sulcatur Fabricius, 1775	Sensitive ecosystems	4	27	November
Ontherus sulcatur Fabricius, 1775	Palm plantations	1	1	November
Ontherus sulcatur Fabricius, 1775	Palm plantations	1	8	November
Ontherus sulcatur Fabricius, 1775	Palm plantations	2	2	November
Ontherus sulcatur Fabricius, 1775	Palm plantations	3	1	November
Ontherus sulcatur Fabricius, 1775	Palm plantations	4	2	November
Ontherus sulcatur Fabricius, 1775	Agricultural soils	1	1	December
Ontherus sulcatur Fabricius, 1775	Agricultural soils	2	3	December
Ontherus sulcatur Fabricius, 1775	Agricultural soils	3	1	December
Ontherus sulcatur Fabricius, 1775	Natural forest	1	1	December
Ontherus sulcatur Fabricius, 1775	Natural forest	1	8	December
Ontherus sulcatur Fabricius, 1775	Natural forest	2	2	December
Ontherus sulcatur Fabricius, 1775	Natural forest	2	7	December
Ontherus sulcatur Fabricius, 1775	Natural forest	3	2	December
Ontherus sulcatur Fabricius, 1775	Natural forest	4	1	December
Ontherus sulcatur Fabricius, 1775	Natural forest	4	15	December
Ontherus sulcatur Fabricius, 1775	Sensitive ecosystems	3	1	December
Ontherus sulcatur Fabricius, 1775	Sensitive ecosystems	3	14	December
Ontherus sulcatur Fabricius, 1775	Sensitive ecosystems	4	1	December
Ontherus sulcatur Fabricius, 1775	Palm plantations	1	1	December
Ontherus sulcatur Fabricius, 1775	Palm plantations	1	1	December
Ontherus sulcatur Fabricius, 1775	Palm plantations	2	13	December
Ontherus sulcatur Fabricius, 1775	Palm plantations	3	6	December
Ontherus sulcatur Fabricius, 1775	Agricultural soils	1	1	January 2019
Ontherus sulcatur Fabricius, 1775	Agricultural soils	2	2	January 2019
Ontherus sulcatur Fabricius, 1775	Agricultural soils	3	2	January 2019
Ontherus sulcatur Fabricius, 1775	Natural forest	1	1	January 2019
Ontherus sulcatur Fabricius, 1775	Natural forest	3	1	January 2019
Ontherus sulcatur Fabricius, 1775	Natural forest	4	1	January 2019
Ontherus sulcatur Fabricius, 1775	Sensitive ecosystems	3	5	January 2019
Ontherus sulcatur Fabricius, 1775	Sensitive ecosystems	4	9	January 2019
Ontherus sulcatur Fabricius, 1775	Palm plantations	1	1	January 2019
Ontherus sulcatur Fabricius, 1775	Palm plantations	2	7	January 2019
Ontherus sulcatur Fabricius, 1775	Palm plantations	3	4	January 2019
Ontherus sulcatur Fabricius, 1775	Palm plantations	4	1	January 2019
Ontherus sulcatur Fabricius, 1775	Palm plantations	4	4	January 2019
Onthophagus haematopus Harold, 1887	Natural forest	1	83	February
Onthophagus haematopus Harold, 1887	Natural forest	1	6	March
Onthophagus haematopus Harold, 1887	Natural forest	1	3	July
Onthophagus haematopus Harold, 1887	Natural forest	2	22	February
Onthophagus haematopus Harold, 1887	Natural forest	2	1	May
Onthophagus haematopus Harold, 1887	Natural forest	2	2	June
Onthophagus haematopus Harold, 1887	Natural forest	2	7	July
Onthophagus haematopus Harold, 1887	Natural forest	3	23	February
Onthophagus haematopus Harold, 1887	Natural forest	3	1	March
Onthophagus haematopus Harold, 1887	Natural forest	4	77	February
Onthophagus haematopus Harold, 1887	Sensitive ecosystems	2	1	March
Onthophagus haematopus Harold, 1887	Sensitive ecosystems	3	2	March
Onthophagus haematopus Harold, 1887	Sensitive ecosystems	4	1	February
Onthophagus haematopus Harold, 1887	Natural forest	1	1	August
Onthophagus haematopus Harold, 1887	Natural forest	2	1	August
Onthophagus haematopus Harold, 1887	Natural forest	2	3	August
Onthophagus haematopus Harold, 1887	Natural forest	3	2	August
Onthophagus haematopus Harold, 1887	Natural forest	4	2	August
Onthophagus haematopus Harold, 1887	Sensitive ecosystems	3	1	August
Onthophagus haematopus Harold, 1887	Natural forest	1	15	September
Onthophagus haematopus Harold, 1887	Natural forest	2	7	September
Onthophagus haematopus Harold, 1887	Natural forest	3	4	September
Onthophagus haematopus Harold, 1887	Natural forest	4	7	September
Onthophagus haematopus Harold, 1887	Natural forest	1	1	October
Onthophagus haematopus Harold, 1887	Natural forest	1	16	October
Onthophagus haematopus Harold, 1887	Natural forest	1	7	October
Onthophagus haematopus Harold, 1887	Natural forest	2	1	October
Onthophagus haematopus Harold, 1887	Natural forest	2	48	October
Onthophagus haematopus Harold, 1887	Natural forest	3	14	October
Onthophagus haematopus Harold, 1887	Natural forest	4	5	October
Onthophagus haematopus Harold, 1887	Natural forest	4	1	October
Onthophagus haematopus Harold, 1887	Sensitive ecosystems	3	1	October
Onthophagus haematopus Harold, 1887	Natural forest	2	9	November
Onthophagus haematopus Harold, 1887	Natural forest	3	2	November
Onthophagus haematopus Harold, 1887	Natural forest	4	1	November
Onthophagus haematopus Harold, 1887	Natural forest	4	5	November
Onthophagus haematopus Harold, 1887	Sensitive ecosystems	4	1	November
Onthophagus haematopus Harold, 1887	Natural forest	1	29	December
Onthophagus haematopus Harold, 1887	Natural forest	2	27	December
Onthophagus haematopus Harold, 1887	Natural forest	2	22	December
Onthophagus haematopus Harold, 1887	Natural forest	3	11	December
Onthophagus haematopus Harold, 1887	Natural forest	3	1	December
Onthophagus haematopus Harold, 1887	Natural forest	4	14	December
Onthophagus haematopus Harold, 1887	Natural forest	4	1	December
Onthophagus haematopus Harold, 1887	Natural forest	1	8	January 2019
Onthophagus haematopus Harold, 1887	Natural forest	2	2	January 2019
Onthophagus haematopus Harold, 1887	Natural forest	4	1	January 2019
Onthophagus hircus Billberg, 1813	Agricultural soils	2	1	June
Onthophagus hircus Billberg, 1813	Agricultural soils	4	2	March
Onthophagus hircus Billberg, 1813	Sensitive ecosystems	2	4	February
Onthophagus hircus Billberg, 1813	Sensitive ecosystems	3	7	February
Onthophagus hircus Billberg, 1813	Sensitive ecosystems	3	4	March
Onthophagus hircus Billberg, 1813	Sensitive ecosystems	4	4	February
Onthophagus hircus Billberg, 1813	Palm plantations	2	1	February
Onthophagus hircus Billberg, 1813	Palm plantations	3	1	February
Onthophagus hircus Billberg, 1813	Palm plantations	4	3	February
Onthophagus hircus Billberg, 1813	Agricultural soils	2	1	September
Onthophagus hircus Billberg, 1813	Agricultural soils	2	2	October
Onthophagus hircus Billberg, 1813	Agricultural soils	3	1	October
Onthophagus hircus Billberg, 1813	Agricultural soils	4	1	October
Onthophagus hircus Billberg, 1813	Sensitive ecosystems	1	7	October
Onthophagus hircus Billberg, 1813	Sensitive ecosystems	2	1	October
Onthophagus hircus Billberg, 1813	Sensitive ecosystems	3	2	October
Onthophagus hircus Billberg, 1813	Sensitive ecosystems	3	9	October
Onthophagus hircus Billberg, 1813	Agricultural soils	1	1	November
Onthophagus hircus Billberg, 1813	Palm plantations	3	1	November
Onthophagus hircus Billberg, 1813	Agricultural soils	4	1	December
Onthophagus hircus Billberg, 1813	Sensitive ecosystems	3	2	December
Onthophagus marginicollis Harold, 1880	Sensitive ecosystems	2	2	February
Onthophagus marginicollis Harold, 1880	Sensitive ecosystems	3	4	March
Onthophagus nyctopus Bates, 1887	Natural forest	3	1	August
Onthophagus nyctopus Bates, 1887	Natural forest	4	1	August
Onthophagus nyctopus Bates, 1887	Sensitive ecosystems	3	2	August
Onthophagus nyctopus Bates, 1887	Natural forest	2	4	September
Onthophagus nyctopus Bates, 1887	Natural forest	4	1	September
Onthophagus nyctopus Bates, 1887	Natural forest	1	1	October
Onthophagus nyctopus Bates, 1887	Natural forest	1	7	October
Onthophagus nyctopus Bates, 1887	Natural forest	1	6	October
Onthophagus nyctopus Bates, 1887	Natural forest	2	15	October
Onthophagus nyctopus Bates, 1887	Natural forest	3	5	October
Onthophagus nyctopus Bates, 1887	Natural forest	4	7	October
Onthophagus nyctopus Bates, 1887	Natural forest	2	1	November
Onthophagus nyctopus Bates, 1887	Natural forest	2	2	December
Onthophagus nyctopus Bates, 1887	Natural forest	1	1	January 2019
Onthophagus onore Zunino & Halffter, 1997	Natural forest	1	2	February
Onthophagus onore Zunino & Halffter, 1997	Natural forest	4	4	February
Onthophagus onore Zunino & Halffter, 1997	Natural forest	1	1	August
Onthophagus onore Zunino & Halffter, 1997	Natural forest	3	1	August
Onthophagus onore Zunino & Halffter, 1997	Natural forest	2	1	September
Onthophagus onore Zunino & Halffter, 1997	Natural forest	4	1	November
Onthophagus onore Zunino & Halffter, 1997	Natural forest	1	1	December
Onthophagus onore Zunino & Halffter, 1997	Natural forest	2	1	December
Onthophagus onore Zunino & Halffter, 1997	Natural forest	2	1	December
Onthophagus onore Zunino & Halffter, 1997	Natural forest	1	1	January 2019
Onthophagus onore Zunino & Halffter, 1997	Natural forest	4	1	January 2019
Onthophagus osculatii Guérin-Méneville, 1855	Natural forest	1	71	February
Onthophagus osculatii Guérin-Méneville, 1855	Natural forest	1	10	March
Onthophagus osculatii Guérin-Méneville, 1855	Natural forest	1	3	July
Onthophagus osculatii Guérin-Méneville, 1855	Natural forest	2	11	February
Onthophagus osculatii Guérin-Méneville, 1855	Natural forest	2	4	July
Onthophagus osculatii Guérin-Méneville, 1855	Natural forest	3	13	February
Onthophagus osculatii Guérin-Méneville, 1855	Natural forest	3	3	March
Onthophagus osculatii Guérin-Méneville, 1855	Natural forest	4	95	February
Onthophagus osculatii Guérin-Méneville, 1855	Natural forest	4	3	March
Onthophagus osculatii Guérin-Méneville, 1855	Natural forest	4	3	July
Onthophagus osculatii Guérin-Méneville, 1855	Sensitive ecosystems	4	1	February
Onthophagus osculatii Guérin-Méneville, 1855	Sensitive ecosystems	3	5	August
Onthophagus osculatii Guérin-Méneville, 1855	Natural forest	2	9	September
Onthophagus osculatii Guérin-Méneville, 1855	Natural forest	1	5	September
Onthophagus osculatii Guérin-Méneville, 1855	Natural forest	3	2	September
Onthophagus osculatii Guérin-Méneville, 1855	Natural forest	4	7	September
Onthophagus osculatii Guérin-Méneville, 1855	Natural forest	1	1	October
Onthophagus osculatii Guérin-Méneville, 1855	Natural forest	1	16	October
Onthophagus osculatii Guérin-Méneville, 1855	Natural forest	1	16	October
Onthophagus osculatii Guérin-Méneville, 1855	Natural forest	2	17	October
Onthophagus osculatii Guérin-Méneville, 1855	Natural forest	3	13	October
Onthophagus osculatii Guérin-Méneville, 1855	Natural forest	4	9	October
Onthophagus osculatii Guérin-Méneville, 1855	Natural forest	2	3	November
Onthophagus osculatii Guérin-Méneville, 1855	Natural forest	4	2	November
Onthophagus osculatii Guérin-Méneville, 1855	Sensitive ecosystems	4	1	November
Onthophagus osculatii Guérin-Méneville, 1855	Natural forest	1	3	December
Onthophagus osculatii Guérin-Méneville, 1855	Natural forest	1	11	December
Onthophagus osculatii Guérin-Méneville, 1855	Natural forest	2	21	December
Onthophagus osculatii Guérin-Méneville, 1855	Natural forest	2	16	December
Onthophagus osculatii Guérin-Méneville, 1855	Natural forest	3	3	December
Onthophagus osculatii Guérin-Méneville, 1855	Natural forest	4	10	December
Onthophagus osculatii Guérin-Méneville, 1855	Natural forest	1	14	January 2019
Onthophagus osculatii Guérin-Méneville, 1855	Natural forest	2	1	January 2019
Onthophagus xanthomerus Bates, 1887	Natural forest	1	2	May
Onthophagus xanthomerus Bates, 1887	Natural forest	1	9	June
Onthophagus xanthomerus Bates, 1887	Natural forest	1	3	July
Onthophagus xanthomerus Bates, 1887	Natural forest	1	4	February
Onthophagus xanthomerus Bates, 1887	Natural forest	1	1	March
Onthophagus xanthomerus Bates, 1887	Natural forest	1	1	May
Onthophagus xanthomerus Bates, 1887	Natural forest	1	1	July
Onthophagus xanthomerus Bates, 1887	Natural forest	2	2	May
Onthophagus xanthomerus Bates, 1887	Natural forest	2	4	July
Onthophagus xanthomerus Bates, 1887	Natural forest	2	1	February
Onthophagus xanthomerus Bates, 1887	Natural forest	3	2	July
Onthophagus xanthomerus Bates, 1887	Natural forest	4	2	June
Onthophagus xanthomerus Bates, 1887	Natural forest	4	4	February
Onthophagus xanthomerus Bates, 1887	Sensitive ecosystems	3	3	June
Onthophagus xanthomerus Bates, 1887	Natural forest	1	4	August
Onthophagus xanthomerus Bates, 1887	Natural forest	1	1	August
Onthophagus xanthomerus Bates, 1887	Natural forest	2	11	August
Onthophagus xanthomerus Bates, 1887	Natural forest	2	2	August
Onthophagus xanthomerus Bates, 1887	Natural forest	3	16	August
Onthophagus xanthomerus Bates, 1887	Natural forest	3	15	August
Onthophagus xanthomerus Bates, 1887	Natural forest	3	1	August
Onthophagus xanthomerus Bates, 1887	Natural forest	4	1	August
Onthophagus xanthomerus Bates, 1887	Natural forest	4	7	August
Onthophagus xanthomerus Bates, 1887	Natural forest	4	2	August
Onthophagus xanthomerus Bates, 1887	Sensitive ecosystems	3	6	August
Onthophagus xanthomerus Bates, 1887	Sensitive ecosystems	3	1	August
Onthophagus xanthomerus Bates, 1887	Natural forest	1	12	September
Onthophagus xanthomerus Bates, 1887	Natural forest	1	14	September
Onthophagus xanthomerus Bates, 1887	Natural forest	1	3	September
Onthophagus xanthomerus Bates, 1887	Natural forest	2	3	September
Onthophagus xanthomerus Bates, 1887	Natural forest	2	12	September
Onthophagus xanthomerus Bates, 1887	Natural forest	3	6	September
Onthophagus xanthomerus Bates, 1887	Natural forest	3	1	September
Onthophagus xanthomerus Bates, 1887	Natural forest	3	1	September
Onthophagus xanthomerus Bates, 1887	Natural forest	4	4	September
Onthophagus xanthomerus Bates, 1887	Natural forest	4	4	September
Onthophagus xanthomerus Bates, 1887	Sensitive ecosystems	4	1	September
Onthophagus xanthomerus Bates, 1887	Natural forest	1	5	October
Onthophagus xanthomerus Bates, 1887	Natural forest	1	2	October
Onthophagus xanthomerus Bates, 1887	Natural forest	1	2	October
Onthophagus xanthomerus Bates, 1887	Natural forest	2	2	October
Onthophagus xanthomerus Bates, 1887	Natural forest	2	1	October
Onthophagus xanthomerus Bates, 1887	Natural forest	3	2	October
Onthophagus xanthomerus Bates, 1887	Natural forest	4	2	October
Onthophagus xanthomerus Bates, 1887	Natural forest	4	1	October
Onthophagus xanthomerus Bates, 1887	Sensitive ecosystems	3	1	October
Onthophagus xanthomerus Bates, 1887	Sensitive ecosystems	4	1	October
Onthophagus xanthomerus Bates, 1887	Natural forest	1	2	November
Onthophagus xanthomerus Bates, 1887	Natural forest	1	1	November
Onthophagus xanthomerus Bates, 1887	Natural forest	2	2	November
Onthophagus xanthomerus Bates, 1887	Natural forest	2	2	November
Onthophagus xanthomerus Bates, 1887	Natural forest	3	2	November
Onthophagus xanthomerus Bates, 1887	Natural forest	4	4	November
Onthophagus xanthomerus Bates, 1887	Sensitive ecosystems	3	1	November
Onthophagus xanthomerus Bates, 1887	Sensitive ecosystems	4	2	November
Onthophagus xanthomerus Bates, 1887	Sensitive ecosystems	4	2	November
Onthophagus xanthomerus Bates, 1887	Natural forest	1	3	December
Onthophagus xanthomerus Bates, 1887	Natural forest	1	13	December
Onthophagus xanthomerus Bates, 1887	Natural forest	2	5	December
Onthophagus xanthomerus Bates, 1887	Natural forest	2	6	December
Onthophagus xanthomerus Bates, 1887	Natural forest	3	3	December
Onthophagus xanthomerus Bates, 1887	Natural forest	4	2	December
Onthophagus xanthomerus Bates, 1887	Sensitive ecosystems	4	1	December
Onthophagus xanthomerus Bates, 1887	Sensitive ecosystems	4	3	December
Onthophagus xanthomerus Bates, 1887	Palm plantations	1	1	December
Onthophagus xanthomerus Bates, 1887	Palm plantations	1	1	December
Onthophagus xanthomerus Bates, 1887	Palm plantations	1	1	December
Onthophagus xanthomerus Bates, 1887	Palm plantations	2	1	December
Onthophagus xanthomerus Bates, 1887	Natural forest	1	5	January 2019
Onthophagus xanthomerus Bates, 1887	Natural forest	1	8	January 2019
Onthophagus xanthomerus Bates, 1887	Natural forest	2	5	January 2019
Onthophagus xanthomerus Bates, 1887	Natural forest	2	3	January 2019
Onthophagus xanthomerus Bates, 1887	Natural forest	4	7	January 2019
Onthophagus xanthomerus Bates, 1887	Palm plantations	4	1	January 2019
Oxysternon conspicillatum Weber, 1801	Natural forest	1	1	February
Oxysternon conspicillatum Weber, 1801	Natural forest	1	2	February
Oxysternon conspicillatum Weber, 1801	Natural forest	2	1	March
Oxysternon conspicillatum Weber, 1801	Natural forest	3	1	February
Oxysternon conspicillatum Weber, 1801	Natural forest	3	2	February
Oxysternon conspicillatum Weber, 1801	Natural forest	1	1	January 2019
Oxysternon silenus d’Olsouefieff, 1924	Natural forest	1	1	March
Oxysternon silenus d’Olsouefieff, 1924	Sensitive ecosystems	3	1	March
Oxysternon silenus d’Olsouefieff, 1924	Palm plantations	1	1	February
Oxysternon silenus d’Olsouefieff, 1924	Palm plantations	3	1	July
Oxysternon silenus d’Olsouefieff, 1924	Natural forest	1	1	August
Oxysternon silenus d’Olsouefieff, 1924	Palm plantations	2	1	August
Oxysternon silenus d’Olsouefieff, 1924	Palm plantations	4	1	August
Oxysternon silenus d’Olsouefieff, 1924	Palm plantations	1	1	September
Oxysternon silenus d’Olsouefieff, 1924	Palm plantations	4	2	October
Oxysternon silenus d’Olsouefieff, 1924	Palm plantations	3	1	October
Oxysternon silenus d’Olsouefieff, 1924	Agricultural soils	2	1	November
Oxysternon silenus d’Olsouefieff, 1924	Natural forest	1	1	December
Oxysternon silenus d’Olsouefieff, 1924	Natural forest	4	1	December
Oxysternon silenus d’Olsouefieff, 1924	Palm plantations	1	2	December
Oxysternon silenus d’Olsouefieff, 1924	Palm plantations	4	1	December
Oxysternon silenus d’Olsouefieff, 1924	Palm plantations	4	2	December
Oxysternon silenus d’Olsouefieff, 1924	Palm plantations	1	2	January 2019
Oxysternon silenus d’Olsouefieff, 1924	Palm plantations	4	1	January 2019
Phaneus chalcomelas Perty, 1830	Natural forest	1	2	February
Phaneus chalcomelas Perty, 1830	Natural forest	2	3	February
Phaneus chalcomelas Perty, 1830	Natural forest	2	2	March
Phaneus chalcomelas Perty, 1830	Natural forest	3	2	February
Phaneus chalcomelas Perty, 1830	Natural forest	3	1	March
Phaneus chalcomelas Perty, 1830	Sensitive ecosystems	3	1	February
Phaneus chalcomelas Perty, 1830	Sensitive ecosystems	4	1	February
Phaneus chalcomelas Perty, 1830	Sensitive ecosystems	4	1	March
Phaneus chalcomelas Perty, 1830	Natural forest	1	1	August
Phaneus chalcomelas Perty, 1830	Natural forest	2	1	August
Phaneus chalcomelas Perty, 1830	Natural forest	3	5	August
Phaneus chalcomelas Perty, 1830	Natural forest	1	1	October
Phaneus chalcomelas Perty, 1830	Natural forest	2	1	October
Phaneus chalcomelas Perty, 1830	Natural forest	3	2	October
Phaneus chalcomelas Perty, 1830	Natural forest	4	1	October
Phaneus chalcomelas Perty, 1830	Natural forest	4	1	October
Phaneus chalcomelas Perty, 1830	Natural forest	3	1	November
Phaneus chalcomelas Perty, 1830	Natural forest	3	1	November
Phaneus chalcomelas Perty, 1830	Palm plantations	4	1	November
Phaneus chalcomelas Perty, 1830	Natural forest	3	1	December
Phaneus chalcomelas Perty, 1830	Natural forest	3	1	January 2019
Phaneus chalcomelas Perty, 1830	Natural forest	4	1	January 2019
Scyballocanthon furvus(Schmidt, 1920)	Natural forest	1	1	November
Scyballocanthon furvus(Schmidt, 1920)	Natural forest	4	3	December
Scyballocanthon macullatus Schmidt, 1920	Natural forest	2	1	May
Scyballocanthon macullatus Schmidt, 1920	Natural forest	2	1	March
Scyballocanthon macullatus Schmidt, 1920	Natural forest	2	1	May
Scyballocanthon macullatus Schmidt, 1920	Natural forest	2	1	July
Scyballocanthon macullatus Schmidt, 1920	Natural forest	3	1	July
Scyballocanthon macullatus Schmidt, 1920	Natural forest	3	2	March
Scyballocanthon macullatus Schmidt, 1920	Natural forest	3	1	July
Scyballocanthon macullatus Schmidt, 1920	Natural forest	3	1	February
Scyballocanthon macullatus Schmidt, 1920	Natural forest	4	1	February
Scyballocanthon macullatus Schmidt, 1920	Natural forest	4	2	March
Scyballocanthon macullatus Schmidt, 1920	Natural forest	4	1	May
Scyballocanthon macullatus Schmidt, 1920	Natural forest	4	2	July
Scyballocanthon macullatus Schmidt, 1920	Sensitive ecosystems	4	1	March
Scyballocanthon macullatus Schmidt, 1920	Natural forest	1	2	October
Scyballocanthon macullatus Schmidt, 1920	Natural forest	2	1	October
Scyballocanthon macullatus Schmidt, 1920	Natural forest	3	1	October
Scyballocanthon macullatus Schmidt, 1920	Natural forest	4	1	October
Scyballocanthon macullatus Schmidt, 1920	Natural forest	1	1	November
Scyballocanthon macullatus Schmidt, 1920	Natural forest	2	1	November
Scyballocanthon macullatus Schmidt, 1920	Natural forest	4	1	November
Scyballocanthon macullatus Schmidt, 1920	Natural forest	2	1	December
Scyballocanthon macullatus Schmidt, 1920	Natural forest	2	1	December
Scyballocanthon macullatus Schmidt, 1920	Natural forest	3	2	December
Scyballocanthon macullatus Schmidt, 1920	Natural forest	2	1	January 2019
Scyballocanthon macullatus Schmidt, 1920	Natural forest	4	3	January 2019
Uroxys sp1	Natural forest	1	2	July
Uroxys sp1	Natural forest	2	1	February
Uroxys sp1	Natural forest	2	1	July
Uroxys sp1	Natural forest	4	2	February
Uroxys sp1	Natural forest	4	1	July
Uroxys sp1	Natural forest	2	1	August
Uroxys sp1	Natural forest	4	1	August
Uroxys sp1	Natural forest	1	1	September
Uroxys sp1	Natural forest	3	1	September
Uroxys sp1	Natural forest	3	1	September
Uroxys sp1	Natural forest	4	2	September
Uroxys sp1	Natural forest	1	1	October
Uroxys sp1	Natural forest	1	1	October
Uroxys sp1	Natural forest	2	9	October
Uroxys sp1	Natural forest	2	2	October
Uroxys sp1	Natural forest	2	2	October
Uroxys sp1	Natural forest	3	1	October
Uroxys sp1	Natural forest	3	2	October
Uroxys sp1	Natural forest	4	2	October
Uroxys sp1	Natural forest	4	1	October
Uroxys sp1	Natural forest	2	1	November
Uroxys sp1	Natural forest	2	1	November
Uroxys sp1	Natural forest	3	1	November
Uroxys sp1	Natural forest	2	1	December
Uroxys sp1	Natural forest	3	1	December
Uroxys sp1	Natural forest	3	3	December
Uroxys sp1	Natural forest	4	3	December
Uroxys sp1	Natural forest	4	2	January 2019

## Sheet: DIVERSITY INDEX
ECOSYSTEMS	REPETITION	MOTH	RICHNESS	ABUNDANCE	SHANNON INDEX
Agricultural soils	1	March	1	2	0
Agricultural soils	1	June	1	1	0
Agricultural soils	1	October	1	1	0
Agricultural soils	1	November	2	3	0.6365
Agricultural soils	1	December	2	2	0.6931
Agricultural soils	1	January 2019	1	1	0
Agricultural soils	2	February	1	1	0
Agricultural soils	2	June	1	1	0
Agricultural soils	2	August	1	1	0
Agricultural soils	2	September	3	3	1.099
Agricultural soils	2	October	1	2	0
Agricultural soils	2	November	1	1	0
Agricultural soils	2	December	3	7	1.004
Agricultural soils	2	January 2019	2	3	0.6365
Agricultural soils	3	March	2	2	0.6931
Agricultural soils	3	July	1	2	0
Agricultural soils	3	September	1	2	0
Agricultural soils	3	October	3	4	1.04
Agricultural soils	3	December	4	6	1.242
Agricultural soils	3	January 2019	2	3	0.6365
Agricultural soils	4	March	1	2	0
Agricultural soils	4	July	1	1	0
Agricultural soils	4	October	2	2	0.6931
Agricultural soils	4	November	4	5	1.332
Agricultural soils	4	December	2	3	0.6365
Agricultural soils	4	January 2019	1	1	0
Natural forest	1	February	25	508	2.133
Natural forest	1	March	21	168	2.319
Natural forest	1	May	6	41	1.257
Natural forest	1	June	5	37	1.258
Natural forest	1	July	17	65	2.42
Natural forest	1	August	16	87	2.219
Natural forest	1	September	13	112	2.088
Natural forest	1	October	26	210	2.775
Natural forest	1	November	17	101	2.133
Natural forest	1	December	22	305	2.614
Natural forest	1	January 2019	19	156	2.576
Natural forest	2	February	21	373	1.994
Natural forest	2	March	16	73	2.404
Natural forest	2	May	9	34	1.849
Natural forest	2	June	7	33	1.542
Natural forest	2	July	17	118	1.734
Natural forest	2	August	15	100	2.104
Natural forest	2	September	14	81	2.086
Natural forest	2	October	22	209	2.702
Natural forest	2	November	22	219	1.925
Natural forest	2	December	24	428	2.499
Natural forest	2	January 2019	13	52	2.046
Natural forest	3	February	18	234	2.163
Natural forest	3	March	17	115	2.081
Natural forest	3	May	4	30	1.068
Natural forest	3	June	4	27	0.9488
Natural forest	3	July	12	60	2.077
Natural forest	3	August	15	178	1.992
Natural forest	3	September	12	46	1.993
Natural forest	3	October	18	116	2.545
Natural forest	3	November	16	122	1.962
Natural forest	3	December	23	295	2.525
Natural forest	3	January 2019	10	42	1.961
Natural forest	4	February	24	546	2.116
Natural forest	4	March	16	82	2.347
Natural forest	4	May	4	12	0.9831
Natural forest	4	June	6	39	1.152
Natural forest	4	July	9	40	1.7
Natural forest	4	August	13	68	2.097
Natural forest	4	September	16	74	2.402
Natural forest	4	October	20	96	2.524
Natural forest	4	November	21	140	2.308
Natural forest	4	December	25	271	2.625
Natural forest	4	January 2019	18	78	2.365
Sensitive ecosystems	1	February	5	111	0.3627
Sensitive ecosystems	1	March	2	5	0.5004
Sensitive ecosystems	1	July	1	1	0
Sensitive ecosystems	1	October	2	8	0.3768
Sensitive ecosystems	1	November	1	4	0
Sensitive ecosystems	2	February	3	113	0.2413
Sensitive ecosystems	2	March	3	8	0.7356
Sensitive ecosystems	2	October	1	1	0
Sensitive ecosystems	2	November	1	7	0
Sensitive ecosystems	2	December	1	1	0
Sensitive ecosystems	3	February	3	128	0.2573
Sensitive ecosystems	3	March	7	14	1.748
Sensitive ecosystems	3	May	1	1	0
Sensitive ecosystems	3	June	1	3	0
Sensitive ecosystems	3	July	3	92	0.1198
Sensitive ecosystems	3	August	4	15	1.171
Sensitive ecosystems	3	September	1	1	0
Sensitive ecosystems	3	October	4	38	0.8258
Sensitive ecosystems	3	November	4	35	0.3867
Sensitive ecosystems	3	December	3	21	0.7801
Sensitive ecosystems	3	January 2019	1	5	0
Sensitive ecosystems	4	February	12	136	1.053
Sensitive ecosystems	4	March	10	83	1.492
Sensitive ecosystems	4	July	3	34	0.2645
Sensitive ecosystems	4	September	1	1	0
Sensitive ecosystems	4	October	2	6	0.4506
Sensitive ecosystems	4	November	7	39	0.9819
Sensitive ecosystems	4	December	2	5	0.5004
Sensitive ecosystems	4	January 2019	3	11	0.6002
Palm plantations	1	February	4	5	1.332
Palm plantations	1	March	3	4	1.04
Palm plantations	1	May	2	2	0.6931
Palm plantations	1	June	1	2	0
Palm plantations	1	July	4	10	1.28
Palm plantations	1	August	2	4	0.5623
Palm plantations	1	September	4	5	1.332
Palm plantations	1	October	5	8	1.494
Palm plantations	1	November	3	12	0.7215
Palm plantations	1	December	7	19	1.813
Palm plantations	1	January 2019	3	5	1.055
Palm plantations	2	February	4	6	1.33
Palm plantations	2	March	1	1	0
Palm plantations	2	July	2	3	0.6365
Palm plantations	2	August	4	4	1.386
Palm plantations	2	September	2	3	0.6365
Palm plantations	2	October	1	1	0
Palm plantations	2	November	3	9	0.8487
Palm plantations	2	December	7	23	1.422
Palm plantations	2	January 2019	2	12	0.6792
Palm plantations	3	February	4	9	1.311
Palm plantations	3	March	3	6	1.011
Palm plantations	3	July	4	10	0.9404
Palm plantations	3	August	1	2	0
Palm plantations	3	September	2	2	0.6931
Palm plantations	3	October	7	11	1.799
Palm plantations	3	November	4	9	1.003
Palm plantations	3	December	7	28	1.707
Palm plantations	3	January 2019	3	11	1.09
Palm plantations	4	February	4	15	1.194
Palm plantations	4	March	3	3	1.099
Palm plantations	4	June	1	1	0
Palm plantations	4	July	1	1	0
Palm plantations	4	August	3	5	0.9503
Palm plantations	4	September	4	6	1.242
Palm plantations	4	October	4	5	1.332
Palm plantations	4	November	4	8	1.213
Palm plantations	4	December	4	10	1.168
Palm plantations	4	January 2019	7	16	1.771
